# Supplementary material
Source: Research Square preprint supplement (doi:10.21203/rs.3.rs-9208372/v1)
Supplement: Supplementary file 1 [file 2c338037e82484e652066a3a.docx]

**SUPPLEMENTAL INFORMATION**

**Multi-objective AI-driven optimization guides the discovery of high-performance organic photovoltaics**

Feiyue Lu1, Kang An1*, Qin Wang1, Zhipeng Yin1, Xinhui Liu1, Jialin Wu1, Xingwang Kang1, Hongyu Zhang1, Xin Zhang1, Wei Meng1, Lei Ying1, Liang Gao2, Jiaping Lin2, Ning Li1,3*

*1Institute of Polymer Optoelectronic Materials and Devices, Guangdong Basic Research Center of Excellence for Energy and Information Polymer Materials, National Key Laboratory of Luminescent Materials and Devices, South China University of Technology, Guangzhou 510640, China.*

*2Shanghai Key Laboratory of Advanced Polymeric Materials, Key Laboratory for Ultrafine Materials of Ministry of Education, Frontiers Science Center for Materiobiology and Dynamic Chemistry, School of Materials Science and Engineering, East China University of Science and Technology, Shanghai 200237, China*

*3Guangdong Provincial Key Laboratory of Luminescence from Molecular Aggregates, South China University of Technology, Guangzhou, 510640 China*

*Correspondence: [mskangan@scut.edu.cn](mailto:mskangan@scut.edu.cn); ningli2022@scut.edu.cn

**Supplementary Figure**

Figure S1 PM6:D18:L8BO:BTP-eC9 external quantum efficiency (EQE) of optimal devices.

Figure S2 J-V characteristic curves of the optimal device at each iteration.


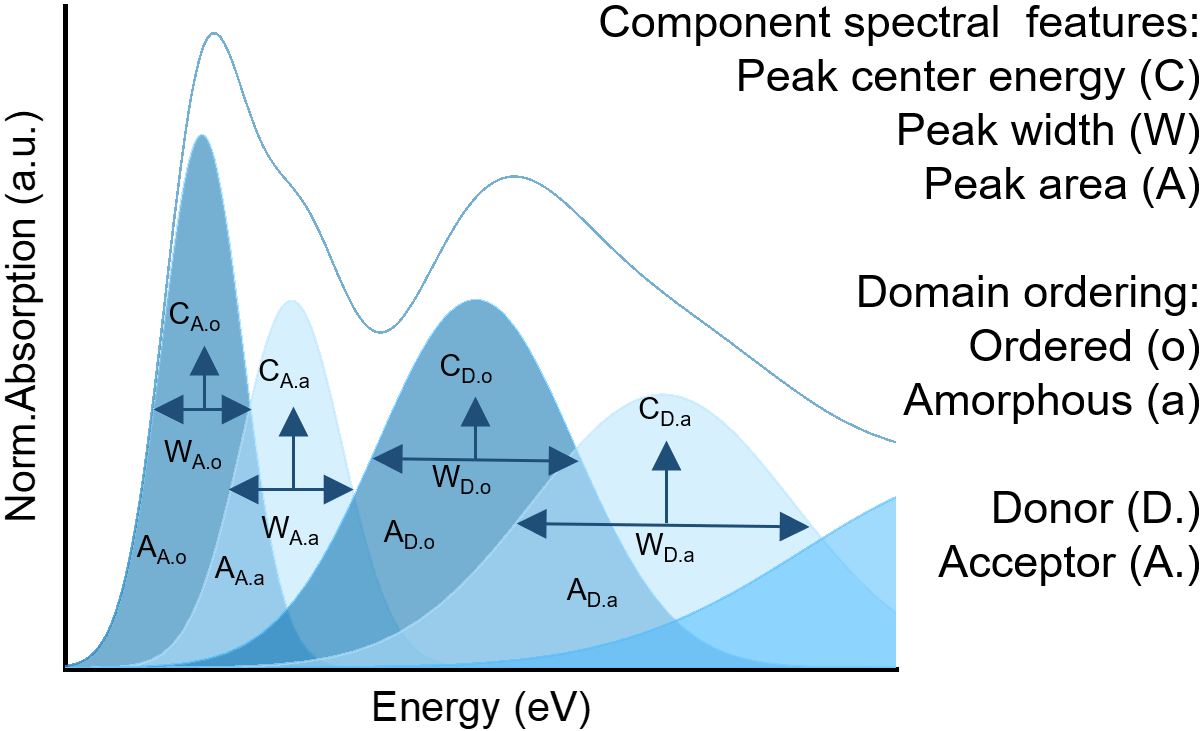


Figure S3 The absorption peaks are decomposed by Gaussian fitting.1 CA.o, WA.o and AA.o respectively represent the peak height, full width at half maximum and area of the receptor ordered phase. CA.a, WA.a, and AA.a respectively represent the peak height, full width at half maximum and area of the receptor amorphous phase; CD.o, WD.o, and AD.o respectively represent the peak height, full width at half maximum and area of the donor ordered phase. CD.a, WD.a, and AD.a respectively represent the peak height, full width at half maximum and area of the donor amorphous phase.


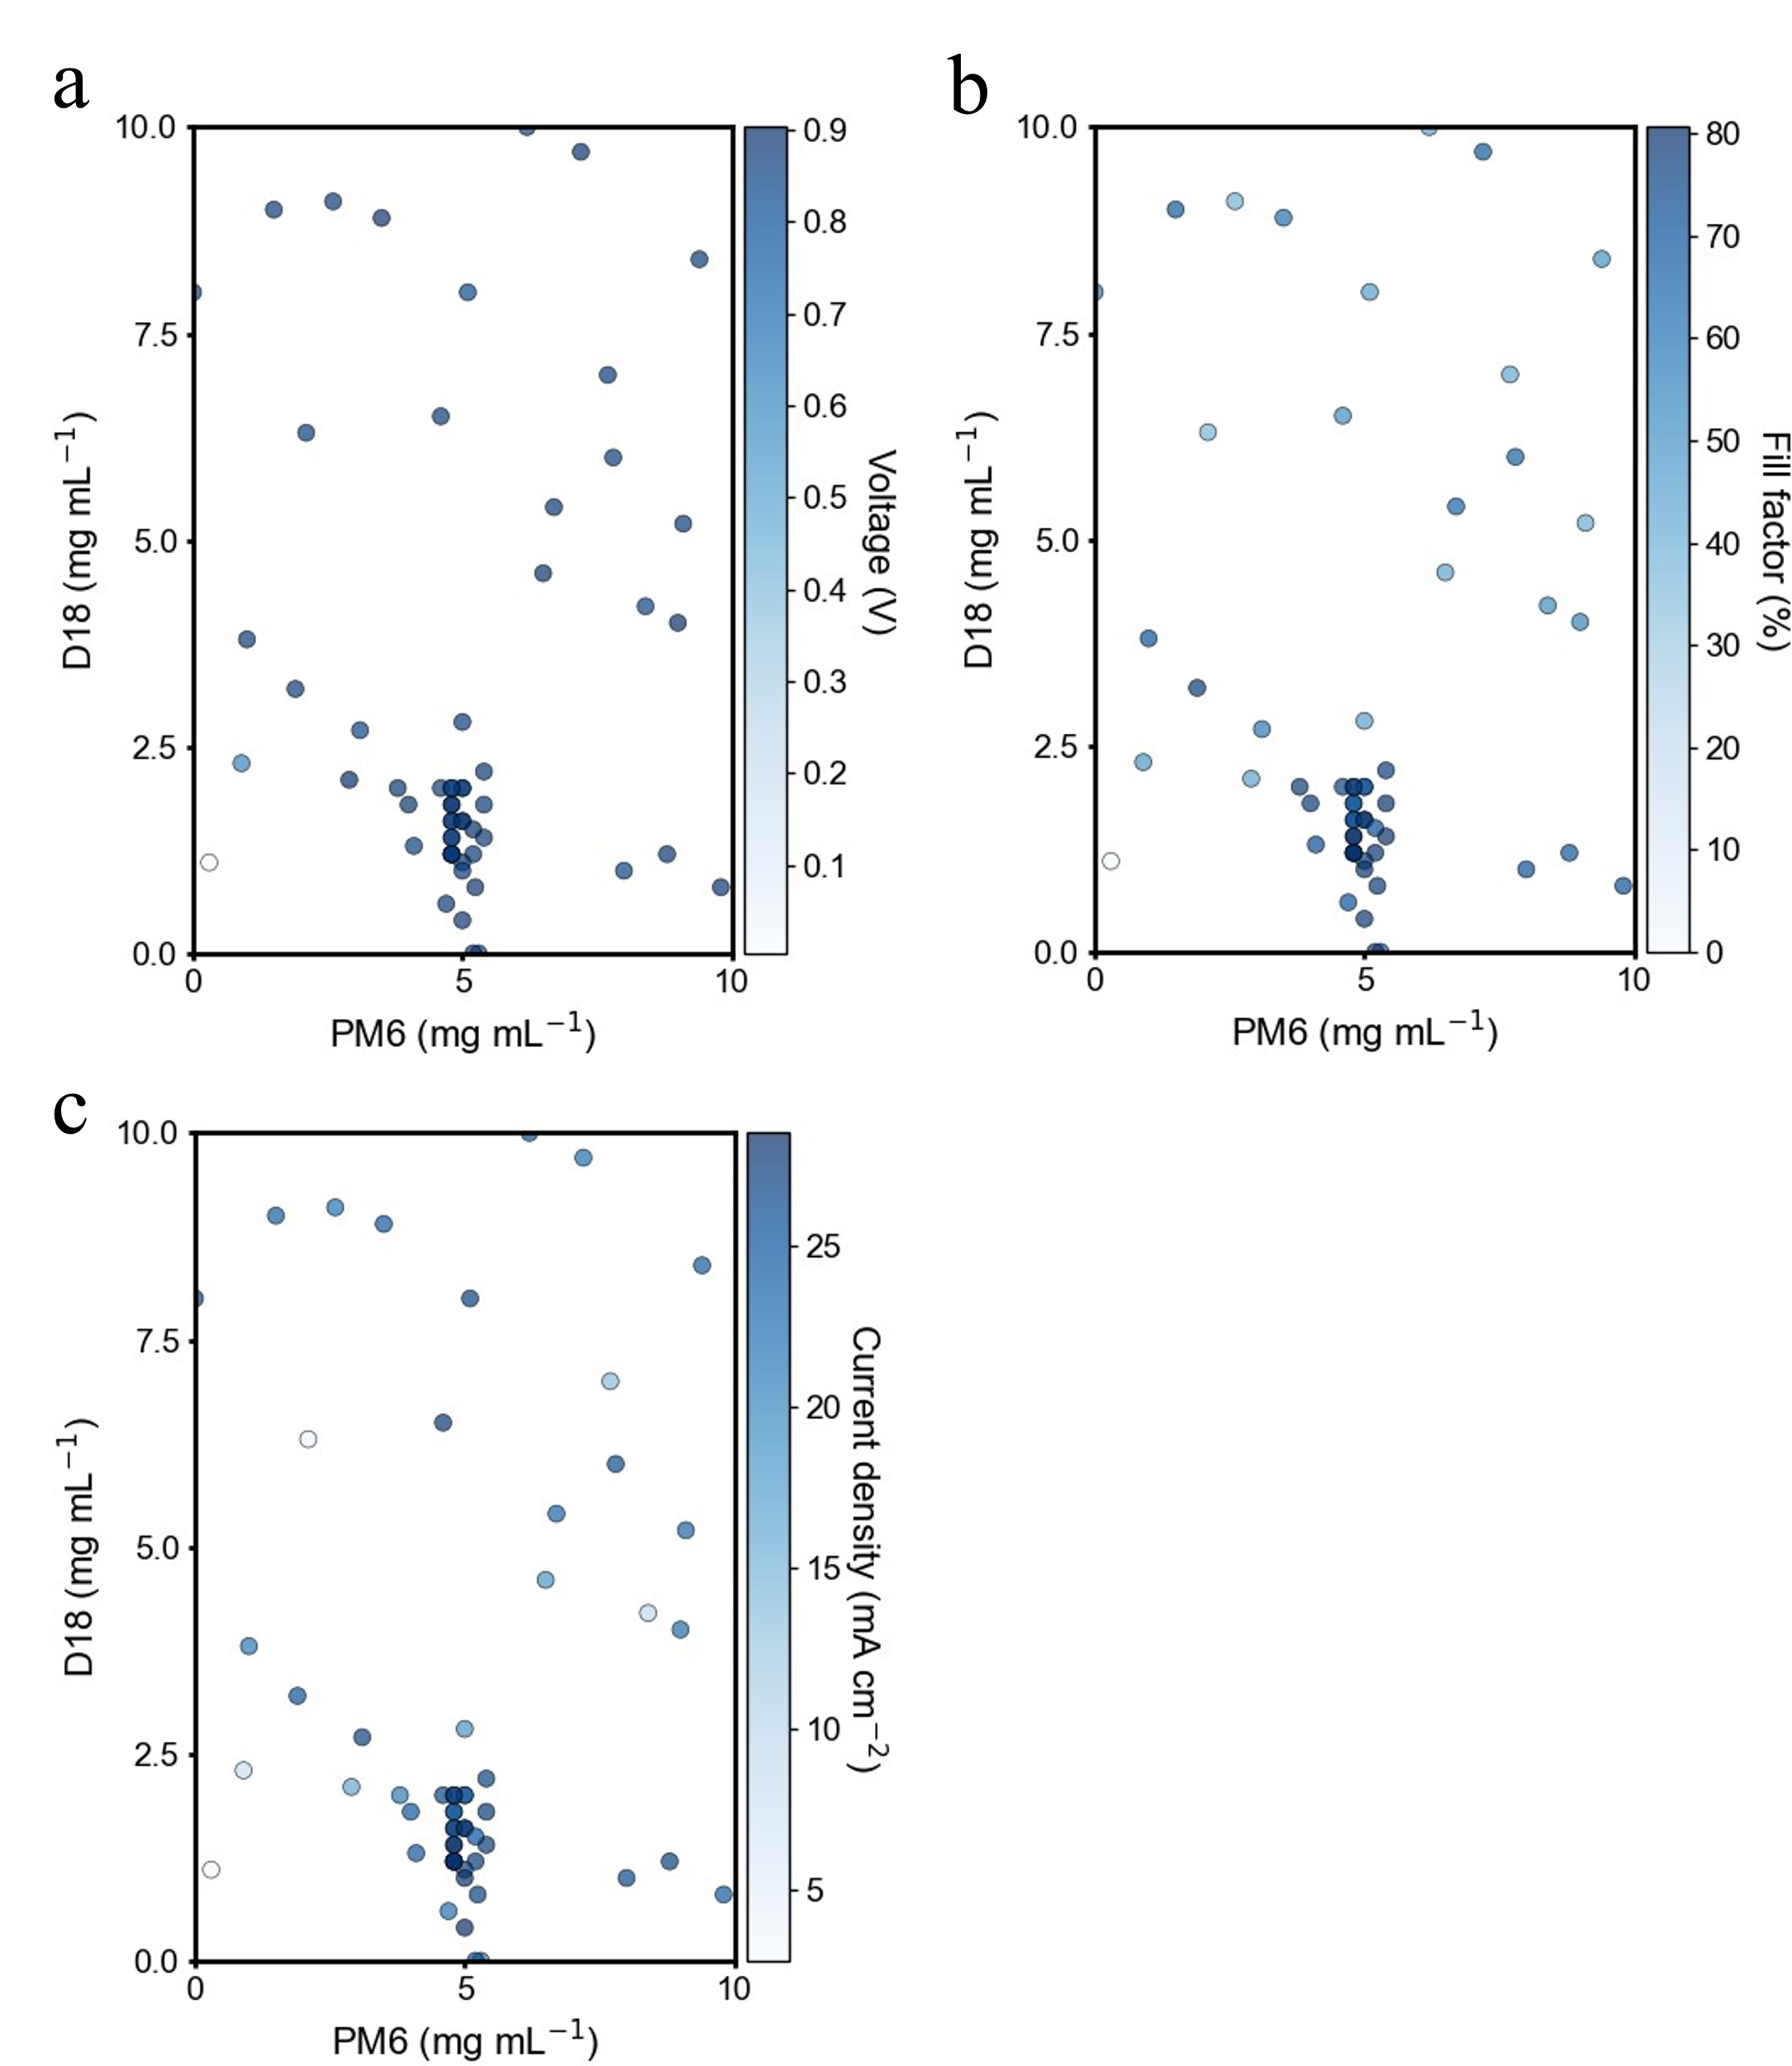


Figure S4 a-c performance of concentration control devices for PM6 and D18.


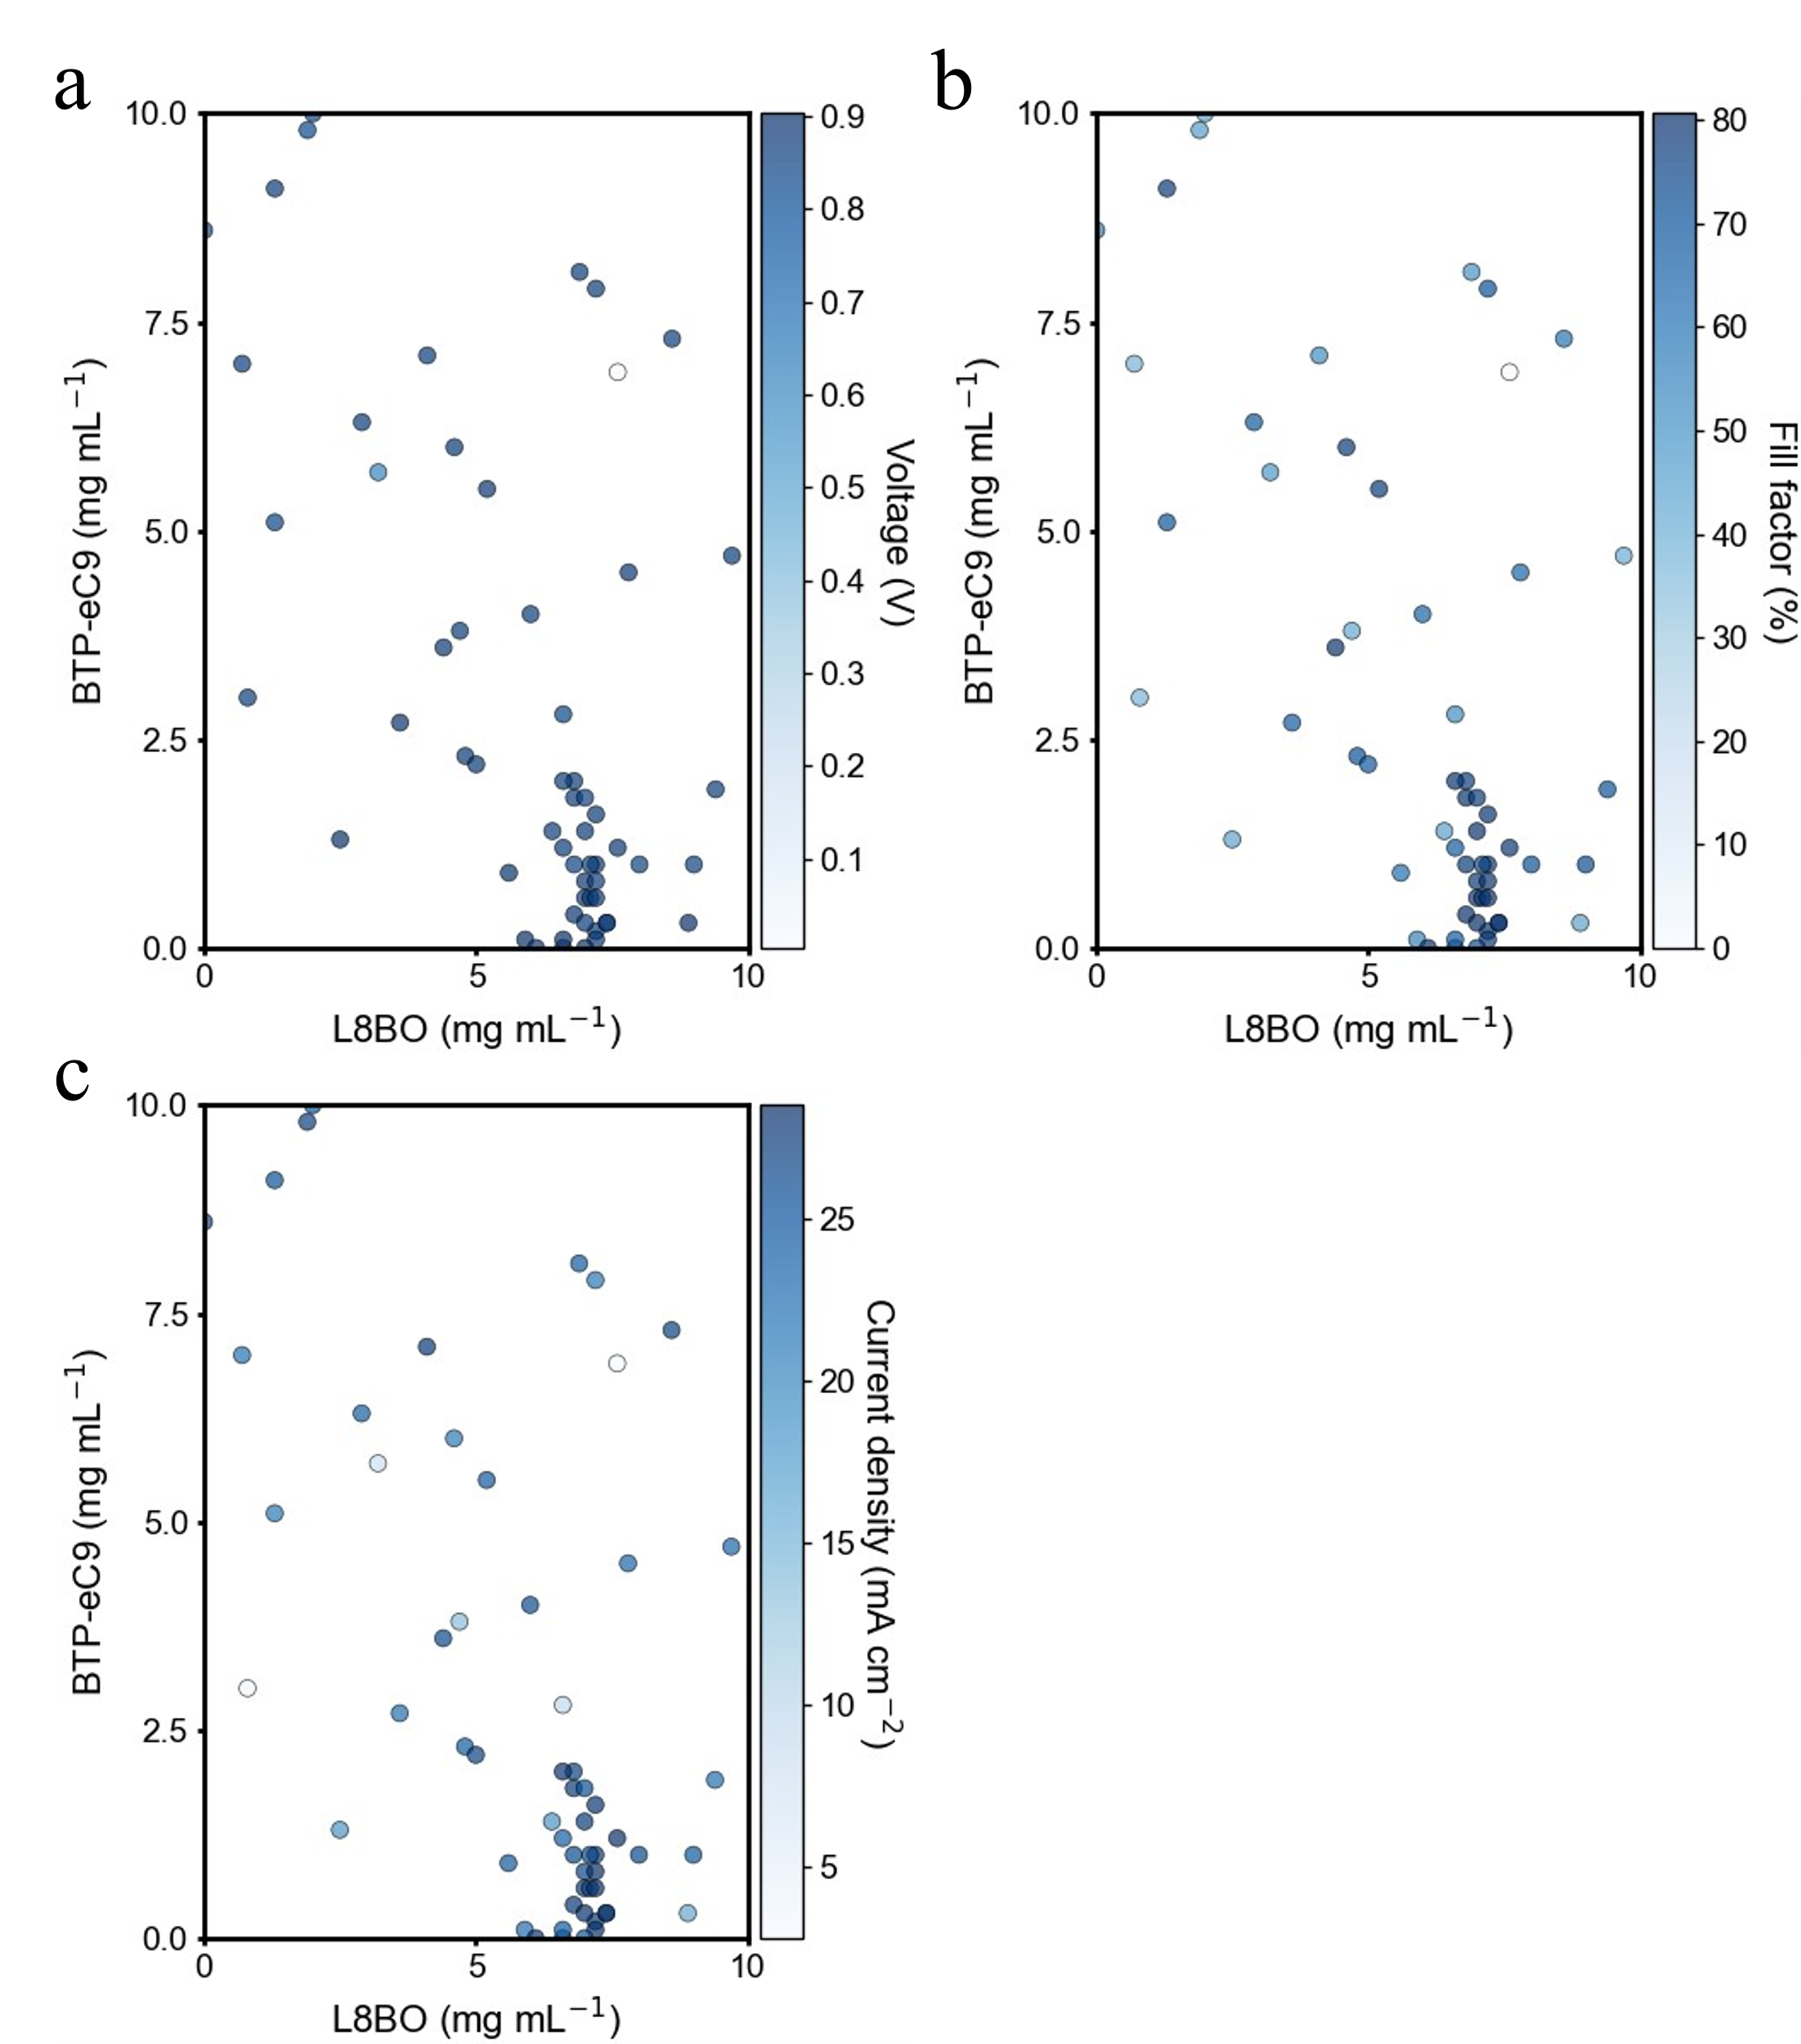


Figure S5 a-c performance of concentration control devices for L8BO and BTP-eC9.


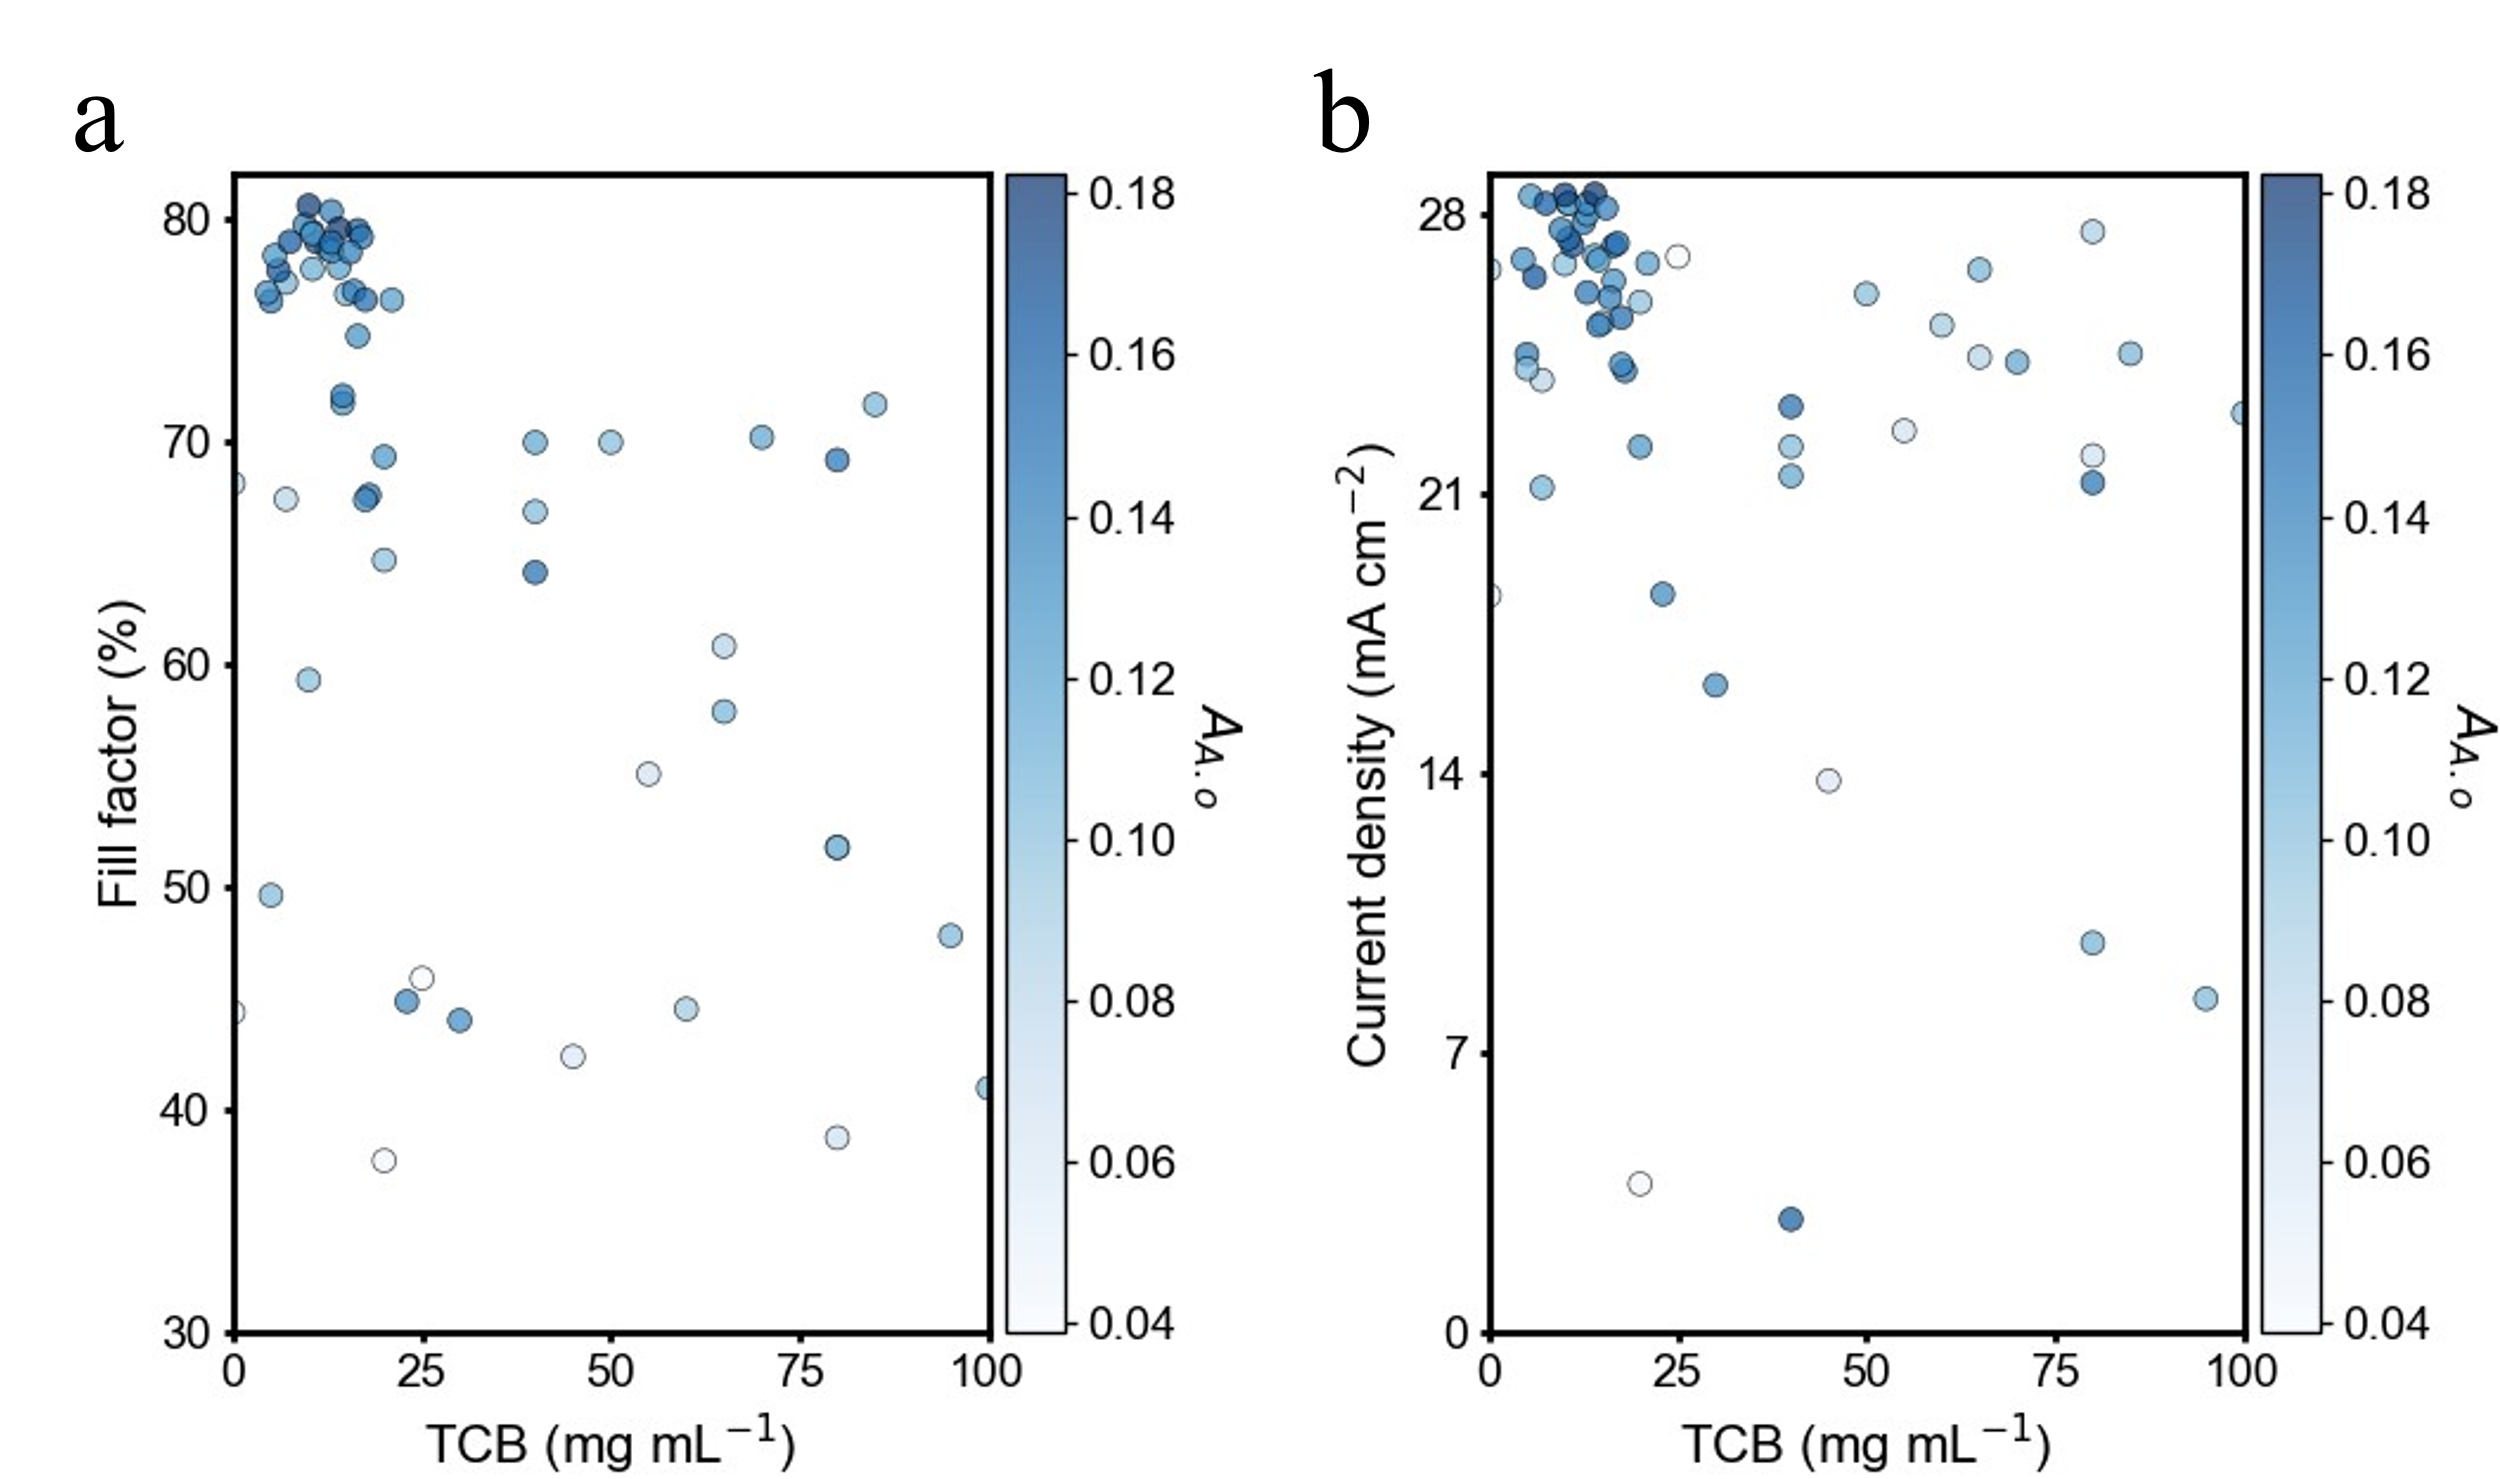


Figure S6 a, b performance of concentration control devices for TCB.


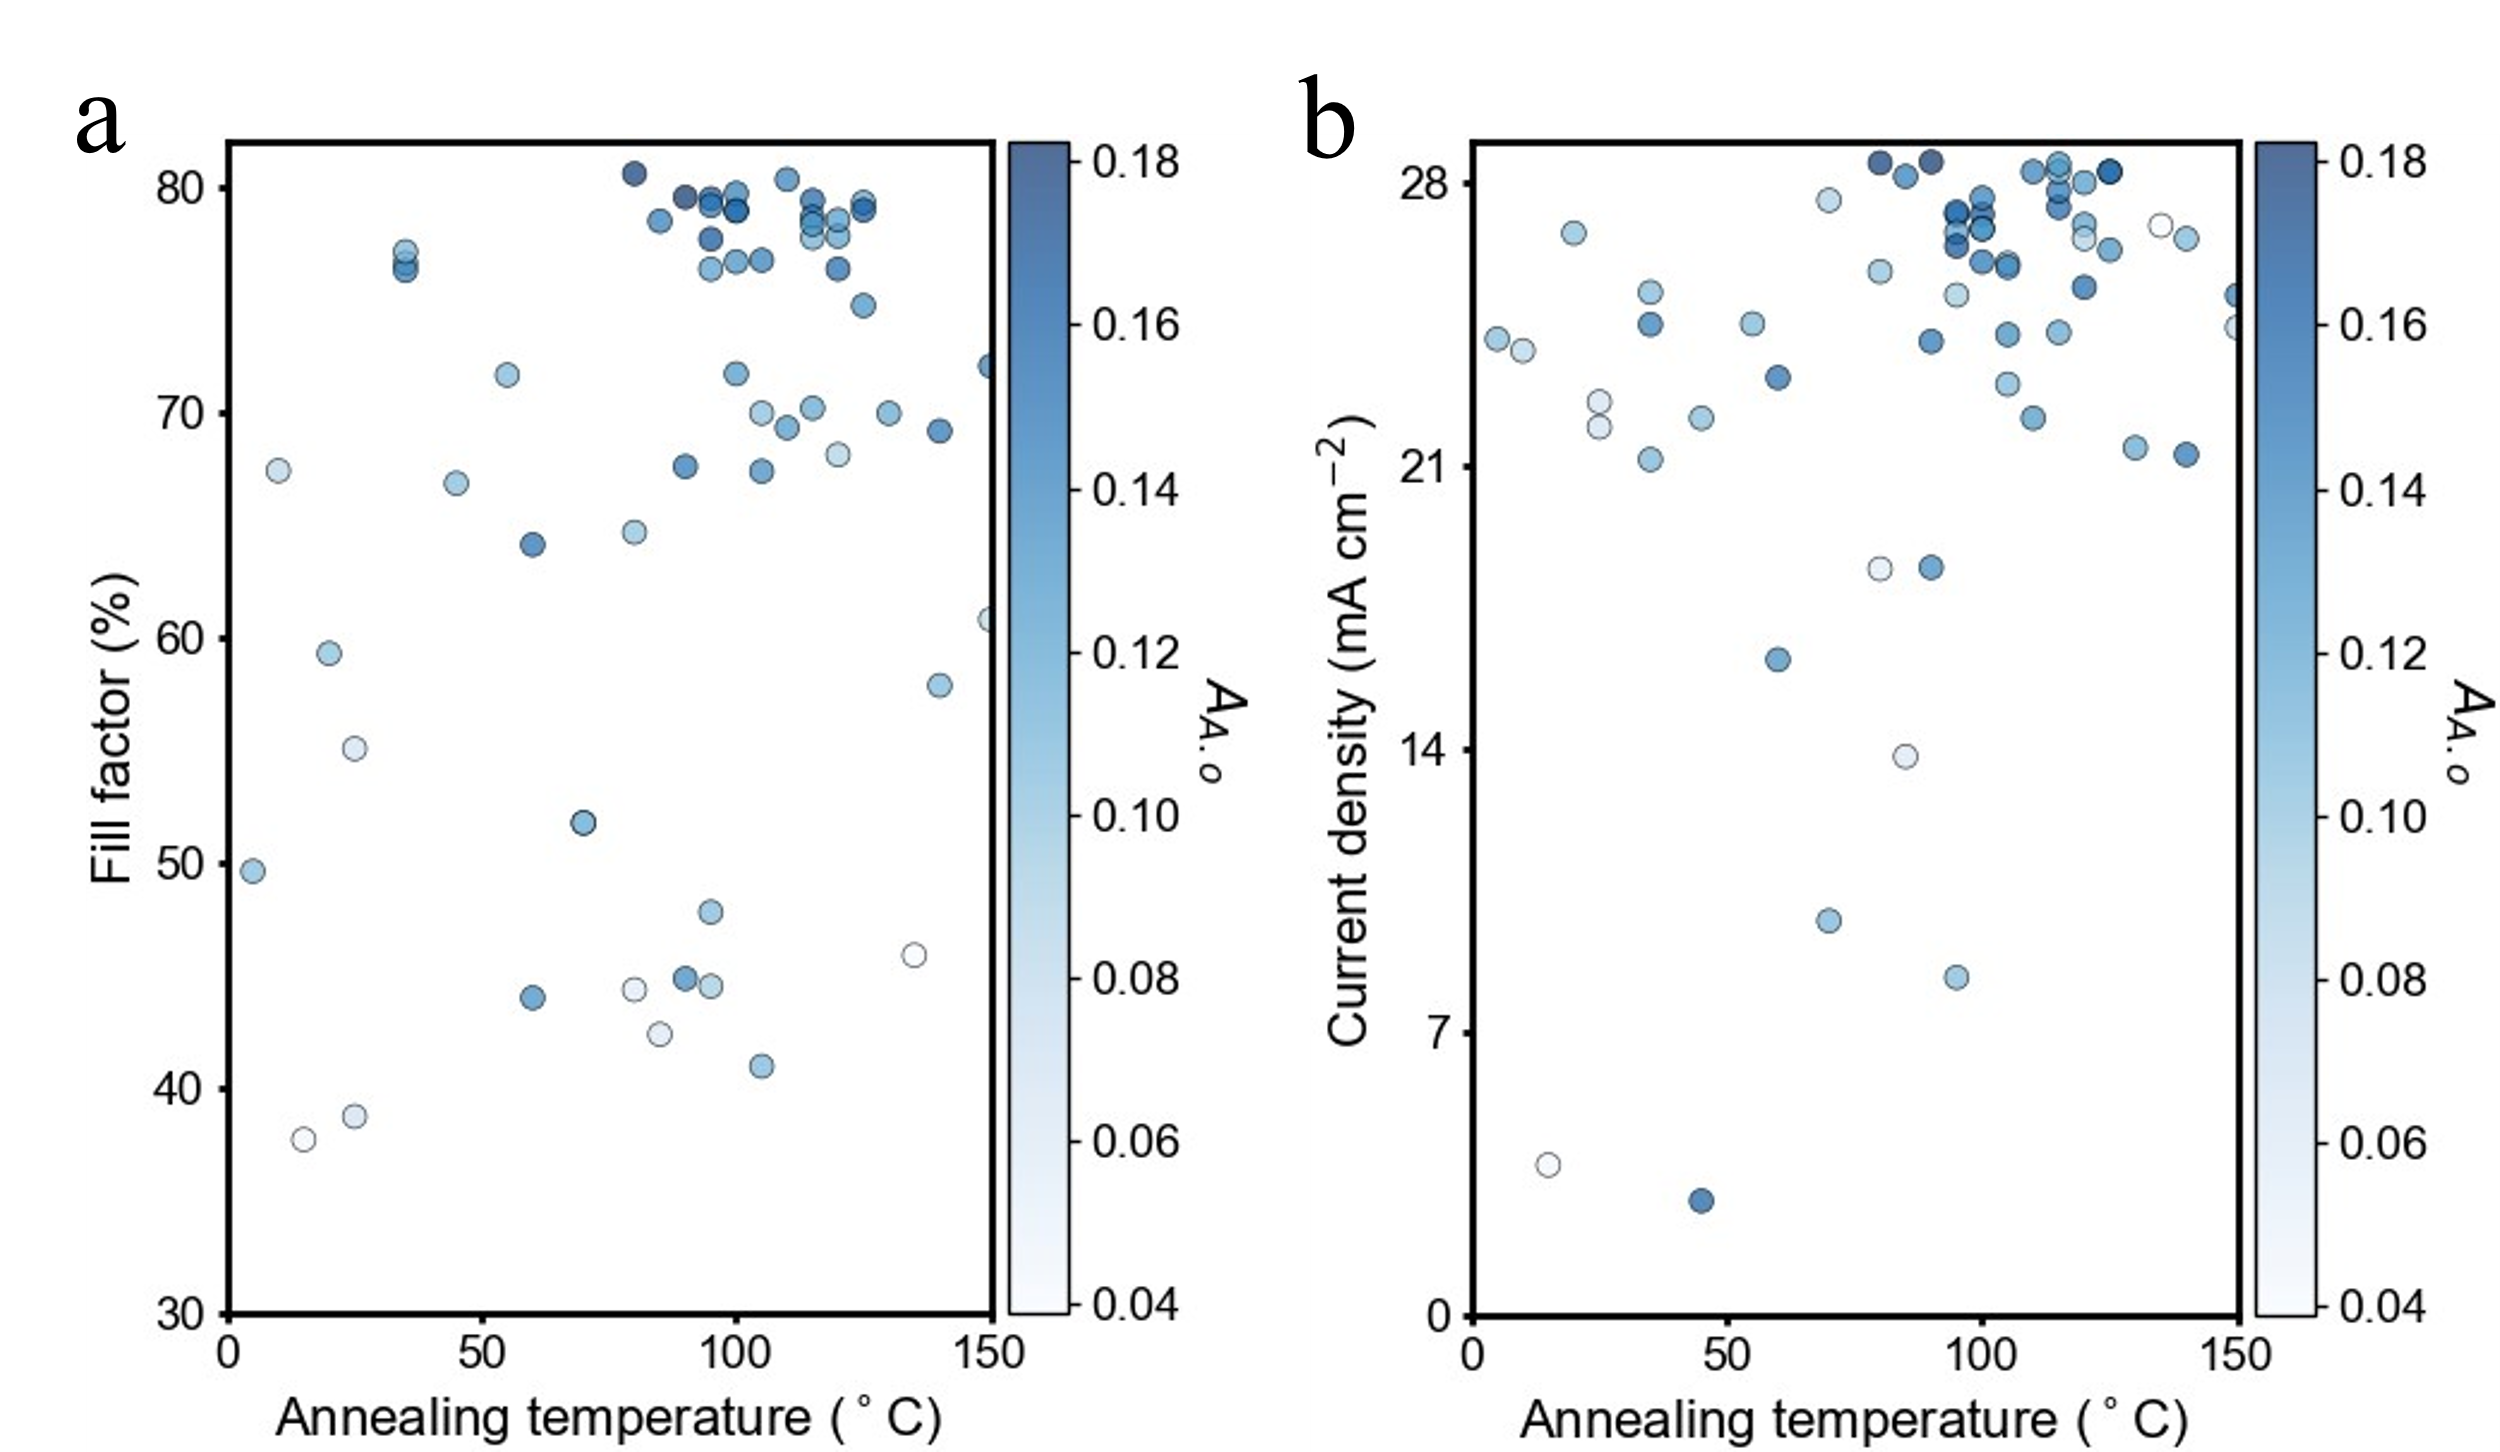


Figure S7 a, b performance of annealing temperature regulating devices.


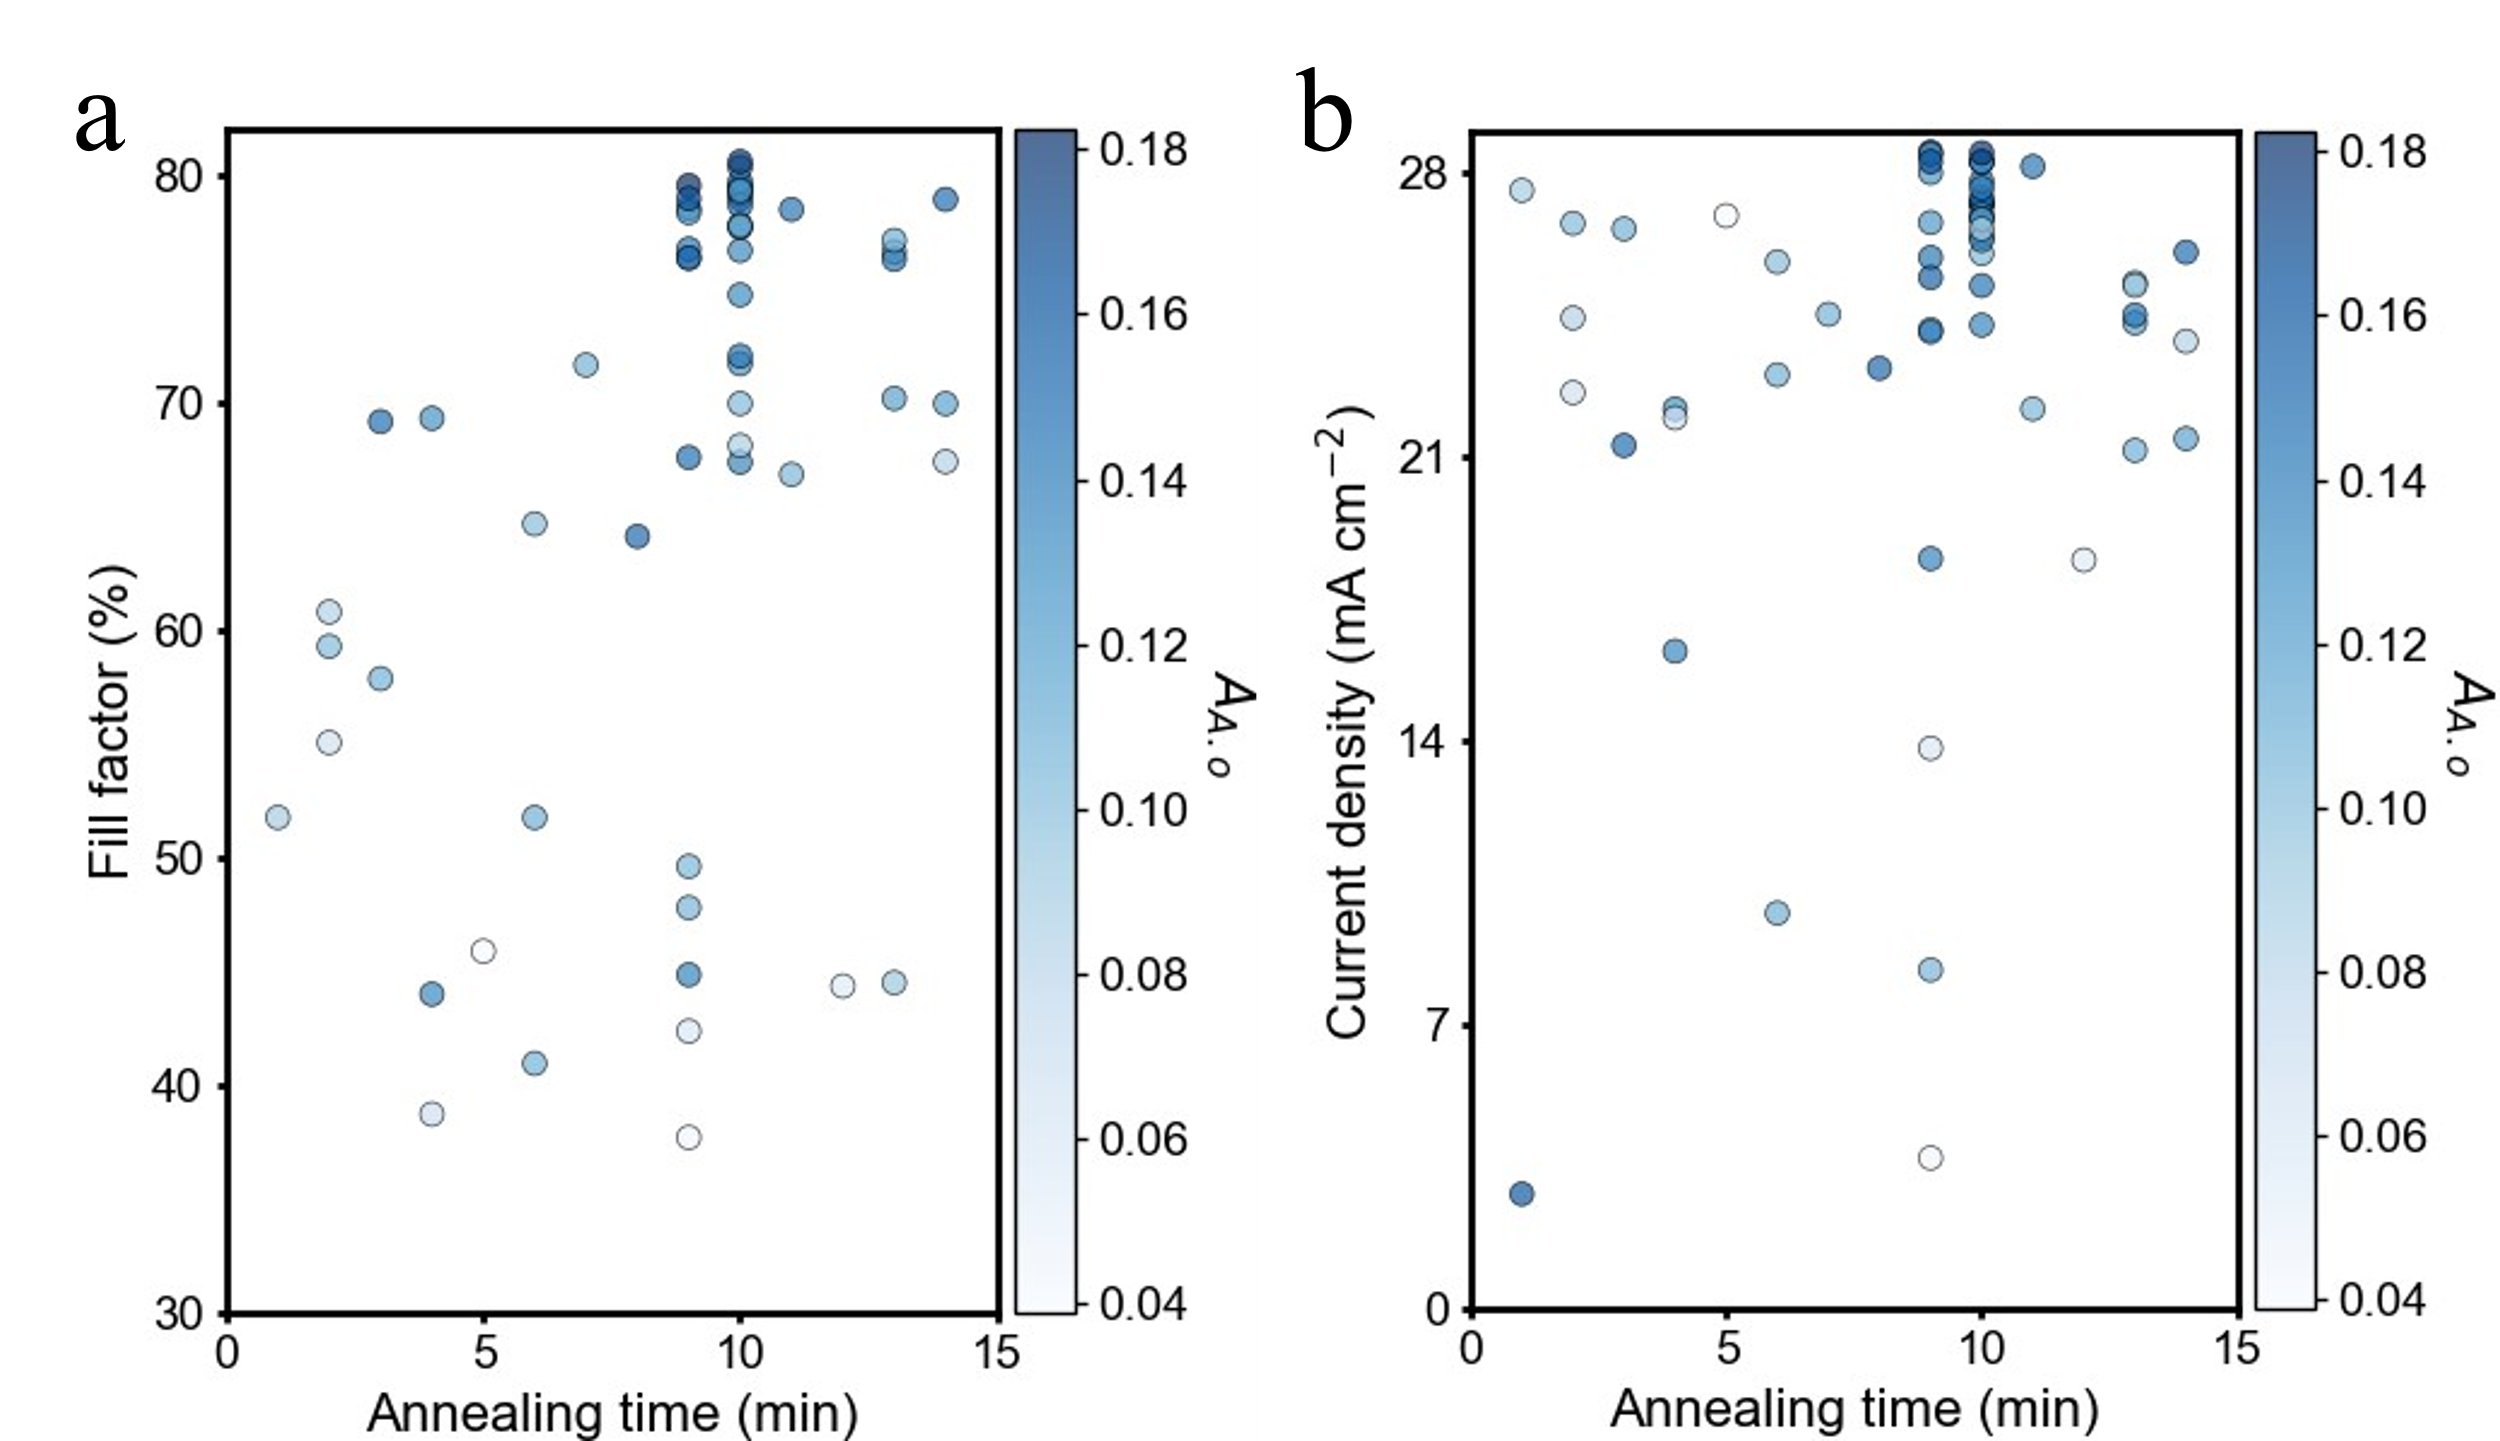


Figure S8 a, b performance of annealing time regulates devices.


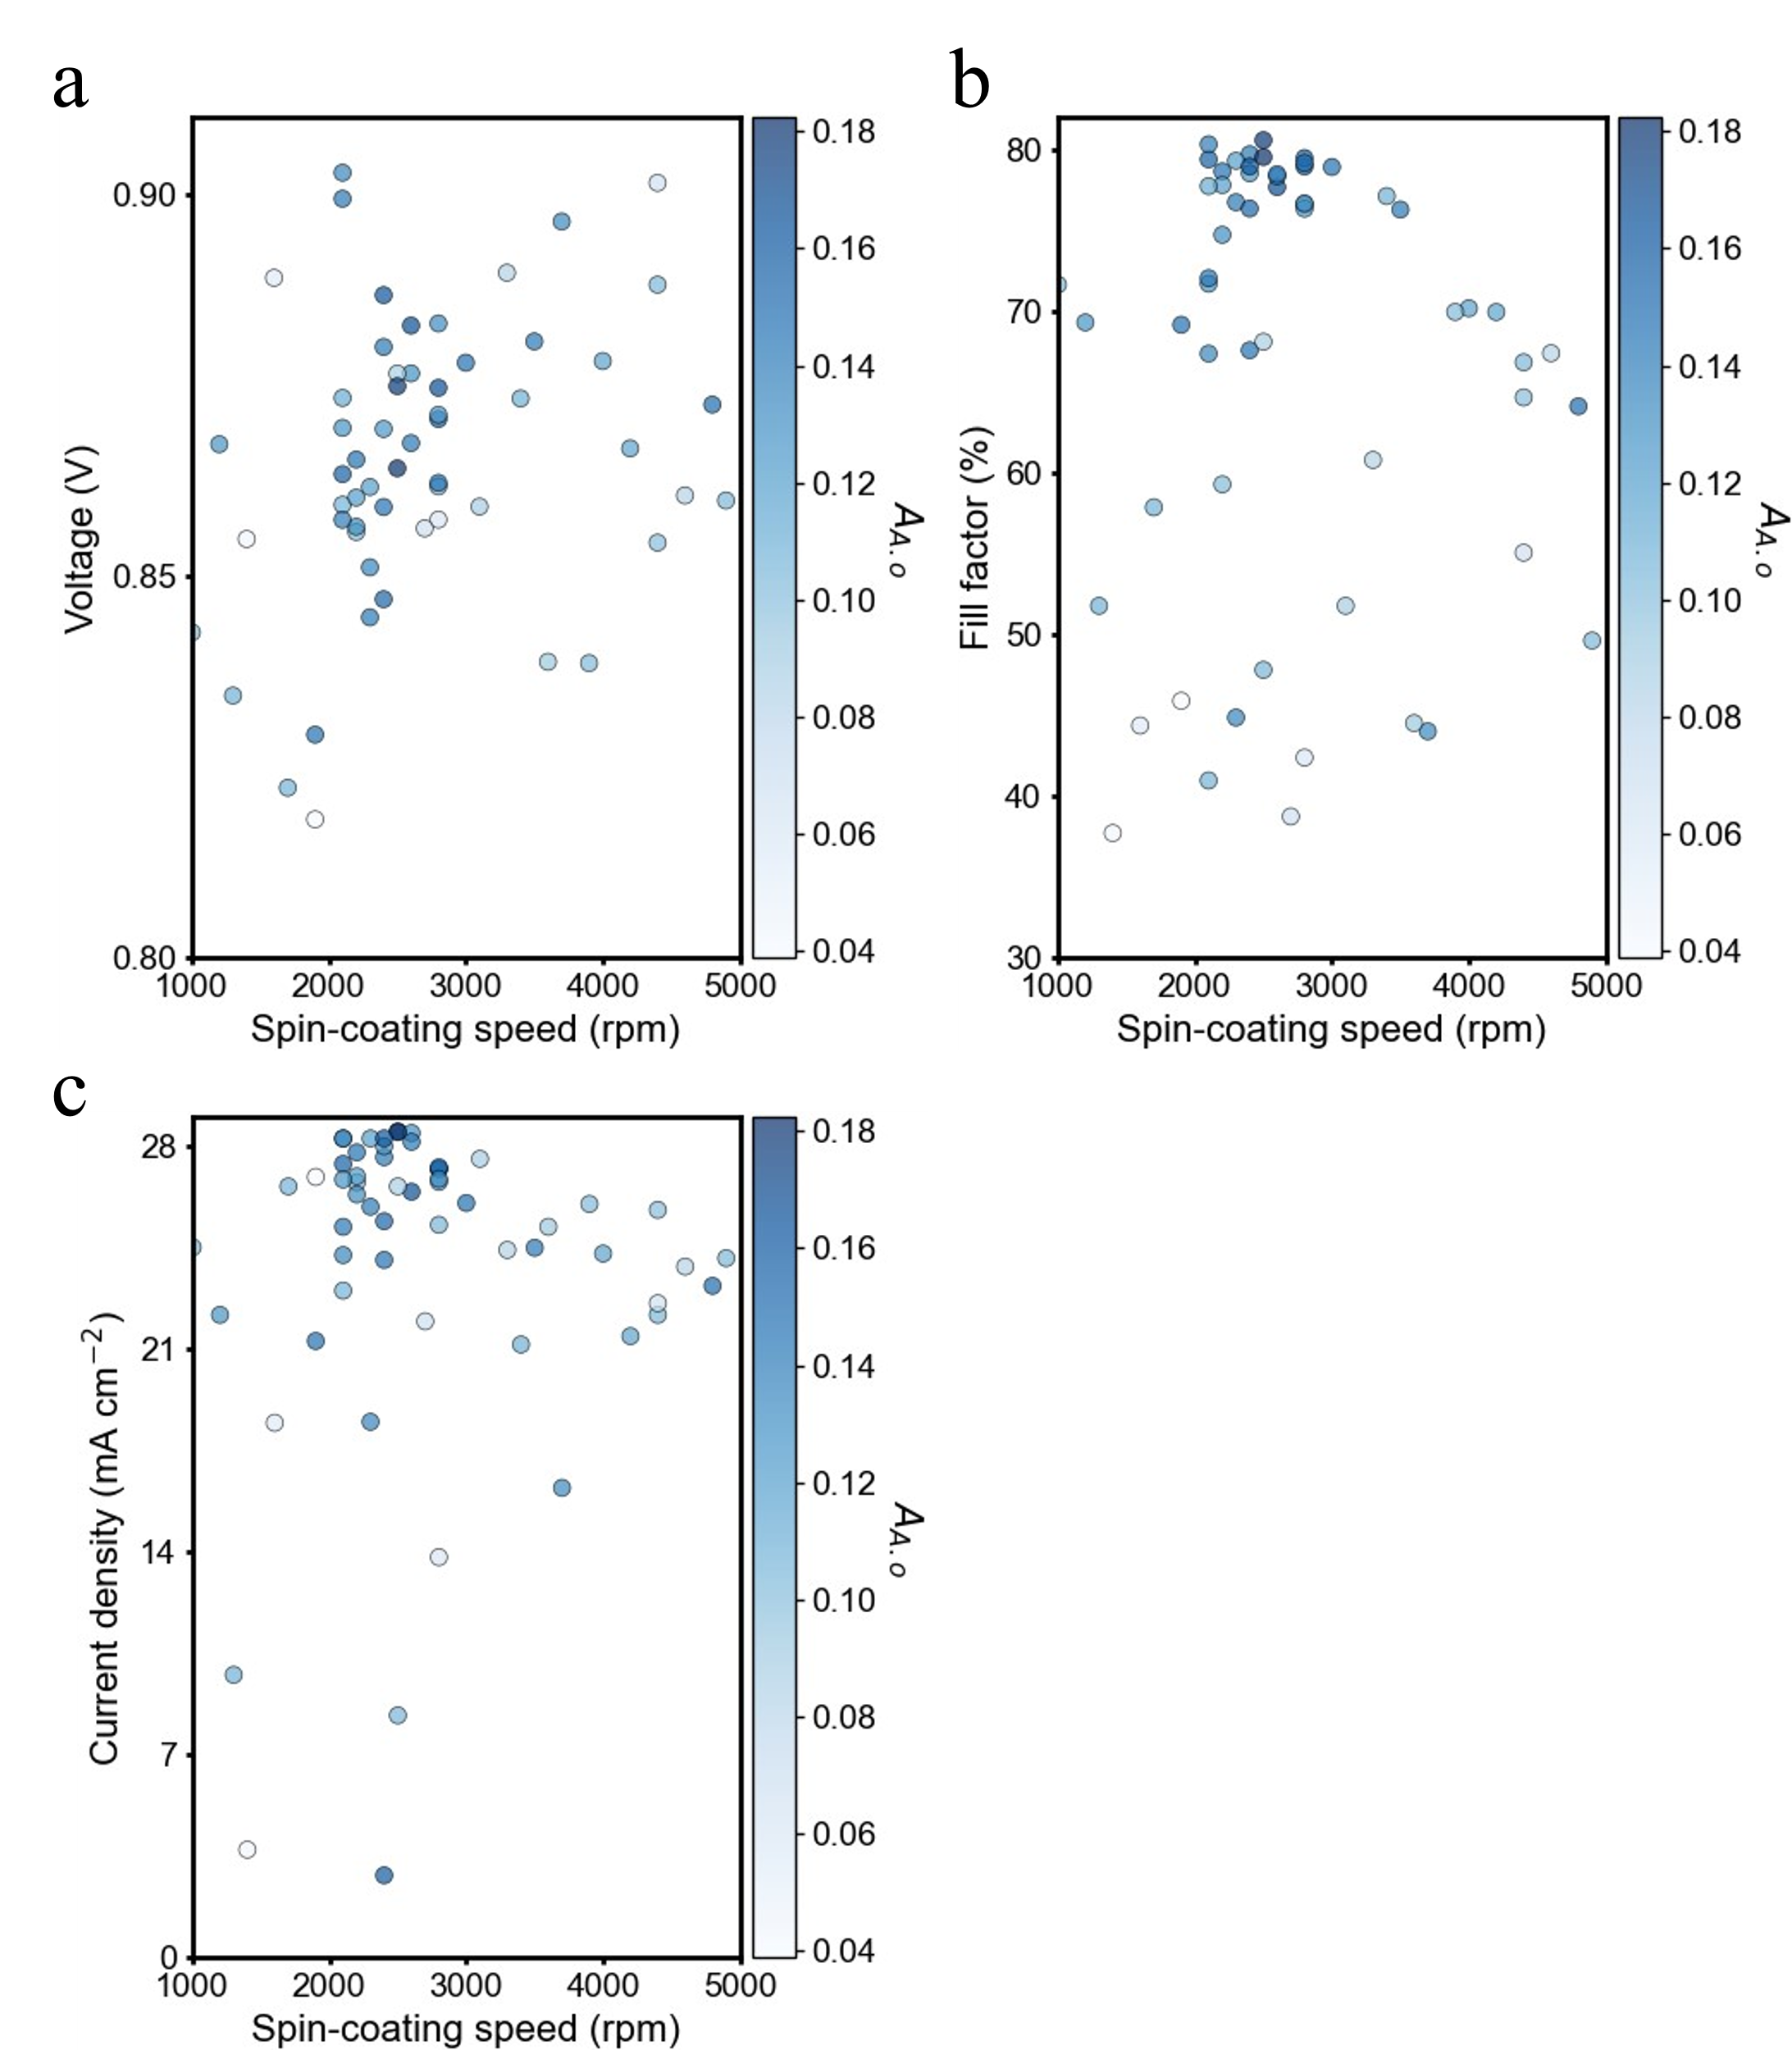


Figure S9 a-c performance of spin-coating speed devices.

**Supplementary Table**

| **Table S 1 Parameter range and sampling interval** | | |
| --- | --- | --- |
| Parameter | Range | Sampling interval |
| PM6 | 0-10 mg mL−1 | 0.1 mg mL−1 |
| D18 | 0-10 mg mL−1 | 0.1 mg mL−1 |
| L8BO | 0-10 mg mL−1 | 0.1 mg mL−1 |
| BTP-eC9 | 0-10 mg mL−1 | 0.1 mg mL−1 |
| TCB | 0-100 mg mL−1 | 0.5 mg mL−1 |
| Spin-speed coating | 1000-5000 rpm | 100 rpm |
| Annealing temperature | 0-150 °C | 10 °C |
| Annealing time | 0-15 min | 1 min |

| **Table S 2 30 sets of process parameters for initial sampling** | | | | | | | | |
| --- | --- | --- | --- | --- | --- | --- | --- | --- |
| Number | PM6  (mg mL-1) | D18  (mg mL-1) | L8BO  (mg mL-1) | BTP-eC9  (mg mL-1) | TCB  (mg mL-1) | A. Tem. (℃) | SS (rpm) | A. Ti. (min) |
| 1 | 0.9 | 2.3 | 3.2 | 5.7 | 95 | 95 | 2500 | 9 |
| 2 | 7.2 | 9.7 | 3.6 | 2.7 | 40.5 | 45 | 4400 | 11 |
| 3 | 1.9 | 3.2 | 1.3 | 9.1 | 15 | 35 | 2800 | 13 |
| 4 | 6.7 | 5.4 | 7.8 | 4.5 | 40 | 60 | 4800 | 8 |
| 5 | 4.7 | 0.6 | 9.4 | 1.9 | 20.5 | 110 | 1200 | 4 |
| 6 | 9.8 | 0.8 | 4.8 | 2.3 | 70.5 | 115 | 4000 | 13 |
| 7 | 5.3 | 0 | 1.3 | 5.1 | 80 | 140 | 1900 | 3 |
| 8 | 6.5 | 4.6 | 2.5 | 1.3 | 0 | 80 | 1600 | 12 |
| 9 | 3.1 | 2.7 | 0 | 8.6 | 65.5 | 140 | 1700 | 3 |
| 10 | 4 | 1.8 | 5.2 | 5.5 | 5 | 35 | 3500 | 13 |
| 11 | 5.1 | 8 | 1.9 | 9.8 | 25 | 135 | 1900 | 5 |
| 12 | 4.6 | 6.5 | 4.1 | 7.1 | 80 | 70 | 3100 | 1 |
| 13 | 7.7 | 7 | 4.7 | 3.8 | 45.5 | 85 | 2800 | 9 |
| 14 | 7.8 | 6 | 6 | 4 | 20 | 80 | 4400 | 6 |
| 15 | 9.1 | 5.2 | 9.7 | 4.7 | 100 | 105 | 2100 | 6 |
| 16 | 9 | 4 | 5.9 | 0.1 | 55 | 25 | 4400 | 2 |
| 17 | 1.5 | 9 | 2.9 | 6.3 | 7.5 | 10 | 4600 | 14 |
| 18 | 0 | 8 | 8.6 | 7.3 | 10 | 20 | 2200 | 2 |
| 19 | 2.9 | 2.1 | 8.9 | 0.3 | 30 | 60 | 3700 | 4 |
| 20 | 8 | 7.2 | 8.1 | 3.3 | 25 | 125 | 3200 | 10 |
| 21 | 3.5 | 8.9 | 5.6 | 0.9 | 65.5 | 150 | 3300 | 2 |
| 22 | 2.6 | 9.1 | 0.7 | 7 | 80 | 25 | 2700 | 4 |
| 23 | 9.4 | 8.4 | 6.9 | 8.1 | 5.5 | 5 | 4900 | 9 |
| 24 | 2.1 | 6.3 | 0.8 | 3 | 20 | 15 | 1400 | 9 |
| 25 | 8.4 | 4.2 | 6.6 | 2.8 | 80 | 70 | 1300 | 6 |
| 26 | 4.1 | 1.3 | 9 | 1 | 85.5 | 55 | 1000 | 7 |
| 27 | 0.3 | 1.1 | 7.6 | 6.9 | 40.5 | 45 | 2400 | 1 |
| 28 | 8 | 1 | 8 | 1 | 50 | 105 | 3900 | 10 |
| 29 | 6.2 | 10 | 2 | 10 | 60.5 | 95 | 3600 | 13 |
| 30 | 1 | 3.8 | 7.2 | 7.9 | 40 | 130 | 4200 | 14 |

A. Tem. denotes the annealing temperature., SS denotes the spin-coating speed, and A.Ti. denotes s the annealing time.

| **Table S 2 (Continued) Device performance of the initial 30 sets of process parameters** | | | | |
| --- | --- | --- | --- | --- |
| Number | Voc (V) | FF (%) | Jsc (mA cm-2) | PCE (%) |
| 1 | 0.608 | 47.801 | 8.347 | 2.416 |
| 2 | 0.888 | 66.852 | 22.181 | 13.112 |
| 3 | 0.862 | 76.633 | 25.293 | 16.629 |
| 4 | 0.872 | 64.128 | 23.183 | 12.913 |
| 5 | 0.867 | 69.322 | 22.181 | 13.276 |
| 6 | 0.878 | 70.195 | 24.299 | 14.912 |
| 7 | 0.829 | 69.177 | 21.279 | 12.152 |
| 8 | 0.889 | 44.354 | 18.452 | 7.244 |
| 9 | 0.822 | 57.872 | 26.619 | 12.611 |
| 10 | 0.881 | 76.313 | 24.498 | 16.392 |
| 11 | 0.818 | 45.885 | 26.945 | 10.134 |
| 12 | 0.859 | 51.771 | 27.571 | 12.285 |
| 13 | 0.857 | 42.370 | 13.812 | 5.027 |
| 14 | 0.854 | 64.679 | 25.806 | 14.287 |
| 15 | 0.859 | 40.953 | 23.020 | 8.117 |
| 16 | 0.901 | 55.064 | 22.583 | 11.231 |
| 17 | 0.861 | 67.416 | 23.849 | 13.862 |
| 18 | 0.856 | 59.294 | 26.758 | 13.603 |
| 19 | 0.896 | 43.997 | 16.206 | 6.404 |
| 20 | * | * | * | * |
| 21 | 0.890 | 60.805 | 24.424 | 13.256 |
| 22 | 0.856 | 38.723 | 21.958 | 7.304 |
| 23 | 0.860 | 49.618 | 24.139 | 10.333 |
| 24 | 0.855 | 37.695 | 3.709 | 1.199 |
| 25 | 0.834 | 51.767 | 9.747 | 4.223 |
| 26 | 0.843 | 71.666 | 24.513 | 14.850 |
| 27 | 0.004 | 0.000 | 2.822 | 0.000 |
| 28 | 0.839 | 69.972 | 26.012 | 15.312 |
| 29 | 0.839 | 44.505 | 25.224 | 9.446 |
| 30 | 0.867 | 69.965 | 21.447 | 13.047 |

* Indicates that the solution concentration is too high to form a film and fabricate the device.

| **Table S 3 Recommended process parameters for the first round of iteration of the MOBO model** | | | | | | | | |
| --- | --- | --- | --- | --- | --- | --- | --- | --- |
| Number | PM6  (mg mL-1) | D18  (mg mL-1) | L8BO  (mg mL-1) | BTP-eC9  (mg mL-1) | TCB  (mg mL-1) | A. Tem. (℃) | SS (rpm) | A.Ti (min) |
| 31 | 3.8 | 2 | 4.6 | 6 | 7 | 35 | 3400 | 13 |
| 32 | 5.2 | 1.2 | 7.2 | 1 | 11 | 100 | 2800 | 10 |
| 33 | 5.4 | 1.4 | 7 | 1.4 | 16.5 | 95 | 2800 | 10 |
| 34 | 5.4 | 1.8 | 6.8 | 1.8 | 17 | 95 | 2800 | 10 |
| 35 | 5.4 | 2.2 | 6.8 | 2 | 21 | 95 | 2800 | 9 |
| 36 | 5 | 1.1 | 7 | 0.8 | 6 | 95 | 2600 | 10 |

| **Table S 3 (Continued) Device performance of the process parameters in the first round of iteration** | | | | |
| --- | --- | --- | --- | --- |
| Number | Voc (V) | FF (%) | Jsc (mA cm-2) | PCE (%) |
| 31 | 0.873 | 77.147 | 21.158 | 14.304 |
| 32 | 0.875 | 78.978 | 27.221 | 18.870 |
| 33 | 0.871 | 79.499 | 27.215 | 18.901 |
| 34 | 0.862 | 79.193 | 27.279 | 18.692 |
| 35 | 0.871 | 76.370 | 26.776 | 17.876 |
| 36 | 0.883 | 77.704 | 26.434 | 18.197 |

| **Table S 4 Recommended process parameters for the second round of iteration of the MOBO model** | | | | | | | | |
| --- | --- | --- | --- | --- | --- | --- | --- | --- |
| Number | PM6  (mg mL-1) | D18  (mg mL-1) | L8BO  (mg mL-1) | BTP-eC9  (mg mL-1) | TCB  (mg mL-1) | A. Tem. (℃) | SS (rpm) | A. Ti (min) |
| 37 | 4.8 | 1.2 | 7.2 | 0.2 | 10.5 | 115 | 2100 | 10 |
| 38 | 4.8 | 1.6 | 7 | 0.6 | 12.5 | 115 | 2200 | 10 |
| 39 | 4.8 | 1.8 | 7.1 | 0.6 | 14 | 120 | 2200 | 10 |
| 40 | 4.6 | 2 | 7.1 | 1 | 16.5 | 125 | 2200 | 10 |
| 41 | 5 | 2 | 6.8 | 1 | 16 | 105 | 2300 | 9 |
| 42 | 5.24 | 0.8 | 7.4 | 0.3 | 4.5 | 100 | 2800 | 10 |

| **Table S 4 (Continued) Device performance of the process parameters in the second round of iteration** | | | | |
| --- | --- | --- | --- | --- |
| Number | Voc (V) | FF (%) | Jsc (mA cm-2) | PCE (%) |
| 37 | 0.863 | 79.420 | 27.394 | 18.816 |
| 38 | 0.865 | 78.677 | 27.796 | 18.955 |
| 39 | 0.860 | 77.831 | 26.969 | 18.089 |
| 40 | 0.856 | 74.748 | 26.340 | 16.892 |
| 41 | 0.845 | 76.767 | 25.915 | 16.831 |
| 42 | 0.883 | 76.698 | 26.876 | 18.235 |

| **Table S 5 Recommended process parameters for the third round of iteration of the MOBO model** | | | | | | | | |
| --- | --- | --- | --- | --- | --- | --- | --- | --- |
| Number | PM6  (mg mL-1) | D18  (mg mL-1) | L8BO  (mg mL-1) | BTP-eC9  (mg mL-1) | TCB  (mg mL-1) | A. Tem. (℃) | SS (rpm) | A. Ti (min) |
| 43 | 4.8 | 1.2 | 7.2 | 0.1 | 10.5 | 115 | 2100 | 10 |
| 44 | 5 | 1.6 | 6.8 | 0.4 | 9.5 | 100 | 2400 | 10 |
| 45 | 4.8 | 1.4 | 7.2 | 1.6 | 13 | 120 | 2400 | 9 |
| 46 | 4.8 | 2 | 7 | 1.8 | 17.5 | 120 | 2400 | 9 |
| 47 | 5 | 2 | 6.6 | 1.2 | 18 | 90 | 2400 | 9 |
| 48 | 5 | 2.8 | 6.4 | 1.4 | 23 | 90 | 2300 | 9 |

| **Table S 5 (Continued) Device performance of the process parameters in the third round of iteration** | | | | |
| --- | --- | --- | --- | --- |
| Number | Voc (V) | FF (%) | Jsc (mA cm-2) | PCE (%) |
| 43 | 0.873 | 77.763 | 28.273 | 19.002 |
| 44 | 0.880 | 79.740 | 27.628 | 19.186 |
| 45 | 0.869 | 78.556 | 28.005 | 18.926 |
| 46 | 0.847 | 76.376 | 25.418 | 16.438 |
| 47 | 0.859 | 67.599 | 24.079 | 13.979 |
| 48 | 0.851 | 44.850 | 18.488 | 7.056 |

| **Table S 6 Recommended process parameters for the 4th round of iteration of the MOBO model** | | | | | | | | |
| --- | --- | --- | --- | --- | --- | --- | --- | --- |
| Number | PM6  (mg mL-1) | D18  (mg mL-1) | L8BO  (mg mL-1) | BTP-eC9  (mg mL-1) | TCB  (mg mL-1) | A. Tem. (℃) | SS (rpm) | A. Ti (min) |
| 49 | 4.8 | 1.2 | 7.4 | 0.3 | 10.5 | 125 | 2300 | 10 |
| 50 | 4.8 | 1.4 | 7 | 0.3 | 13 | 110 | 2100 | 10 |
| 51 | 4.8 | 1.6 | 6.6 | 0 | 14.5 | 100 | 2100 | 10 |
| 52 | 5 | 1 | 7.2 | 0.8 | 14 | 90 | 2500 | 9 |
| 53 | 5 | 0.4 | 7.6 | 1.2 | 5.5 | 115 | 2600 | 9 |
| 54 | 4.8 | 1.8 | 6.6 | 0.1 | 17.5 | 105 | 2100 | 10 |

| **Table S 6 (Continued) Device performance of the process parameters in the 4th round of iteration** | | | | |
| --- | --- | --- | --- | --- |
| Number | Voc (V) | FF (%) | Jsc (mA cm-2) | PCE (%) |
| 49 | 0.862 | 79.335 | 28.275 | 19.338 |
| 50 | 0.857 | 80.353 | 28.275 | 19.478 |
| 51 | 0.869 | 71.721 | 26.856 | 16.745 |
| 52 | 0.864 | 79.563 | 28.519 | 19.606 |
| 53 | 0.877 | 78.368 | 28.463 | 19.561 |
| 54 | 0.903 | 67.388 | 24.247 | 14.751 |

| **Table S 7 Recommended process parameters for the 5th round of iteration of the MOBO model** | | | | | | | | |
| --- | --- | --- | --- | --- | --- | --- | --- | --- |
| Number | PM6  (mg mL-1) | D18  (mg mL-1) | L8BO  (mg mL-1) | BTP-eC9  (mg mL-1) | TCB  (mg mL-1) | A. Tem. (℃) | SS (rpm) | A. Ti (min) |
| 55 | 8.8 | 1.2 | 5 | 2.2 | 0 | 120 | 2500 | 10 |
| 56 | 5.2 | 0 | 4.4 | 3.6 | 13 | 100 | 3000 | 14 |
| 57 | 4.8 | 1.2 | 7.2 | 0.6 | 10 | 80 | 2500 | 10 |
| 58 | 5 | 1.6 | 6.1 | 0 | 7.5 | 125 | 2400 | 9 |
| 59 | 5.2 | 1.5 | 7 | 0 | 14.5 | 150 | 2100 | 10 |
| 60 | 4.8 | 2 | 6.6 | 2 | 15.5 | 85 | 2600 | 11 |

| **Table S 7 (Continued) Device performance of the process parameters in the 5th round of iteration** | | | | |
| --- | --- | --- | --- | --- |
| Number | Voc (V) | FF (%) | Jsc (mA cm-2) | PCE (%) |
| 55 | 0.876 | 68.125 | 26.619 | 15.895 |
| 56 | 0.878 | 78.947 | 26.045 | 18.042 |
| 57 | 0.875 | 80.611 | 28.495 | 20.095 |
| 58 | 0.887 | 78.985 | 28.277 | 19.806 |
| 59 | 0.899 | 72.065 | 25.222 | 16.347 |
| 60 | 0.867 | 78.506 | 28.159 | 19.175 |

| **Table S 8 Correlation coefficient between process parameters, device performance and AA.o/AA.a** | |
| --- | --- |
| Name | AA.o/AA.a |
| PM6 (mg mL-1) | -0.079949 |
| Annealing temperature (℃) | 0.038964 |
| D18 (mg mL-1) | -0.112787 |
| Spin-coating speed (rpm) | -0.140323 |
| L8BO (mg mL-1) | 0.242389 |
| Annealing time (min) | -0.2711 |
| BTP-eC9 (mg mL-1) | -0.427337 |
| TCB (mg mL-1) | 0.066566 |
| Voc (V) | 0.226576 |
| FF (%) | 0.06903 |
| Jsc (mA cm-2) | 0.1597 |

| **Table S 9 Parameter range and sampling interval for D18:L8BO** | | |
| --- | --- | --- |
| Parameter | Range | Sampling interval |
| Solid additive | 0-4 | 1 |
| Additive concentration | 0.2-6 mg mL−1 | 0.2 mg mL−1 |
| D:A ratio | 0.5-2 | 0.1 |
| BHJ concentration | 8-12 mg mL−1 | 0.2 mg mL−1 |
| Spin-speed coating | 800-4000 rpm | 100 rpm |
| Annealing temperature | 25-150 °C | 25 °C |
| Annealing time | 5-20 min | 5 min |

The values for solid additives are as follows: 0 indicates no additive, 1 c1ccc(cc1)COc1ccccc1, 2 c1ccc(cc1)COc1cccc(c1)Br, 3 c1ccc(cc1)COc1ccc(cc1)Br, and 4 c1ccc(cc1)COc1ccc(cc1)I.

| **Table S 10 32 sets of process parameters for D18:L8BO** | | | | | | | |
| --- | --- | --- | --- | --- | --- | --- | --- |
| Number | Solid  additive | Additive  concentration | D:A  ratio | BHJ concentration | A. Tem. (℃) | A. Ti. (min) | SS (rpm) |
| 1 | 0 | 0 | 0.6 | 10.2 | 100 | 15 | 900 |
| 2 | 0 | 0 | 0.5 | 12 | 150 | 5 | 4000 |
| 3 | 0 | 0 | 1.9 | 11.8 | 75 | 10 | 3100 |
| 4 | 0 | 0 | 1.5 | 11 | 50 | 10 | 2500 |
| 5 | 1 | 1.2 | 0.7 | 9.6 | 150 | 20 | 1700 |
| 6 | 1 | 0.6 | 1.2 | 11.8 | 75 | 15 | 1500 |
| 7 | 1 | 1.4 | 1.6 | 9.4 | 125 | 10 | 1200 |
| 8 | 1 | 0.4 | 1.2 | 11.6 | 50 | 5 | 2500 |
| 9 | 1 | 3.4 | 0.9 | 10.6 | 125 | 20 | 1700 |
| 10 | 1 | 1.6 | 1.5 | 10 | 25 | 10 | 2300 |
| 11 | 1 | 2.8 | 1.4 | 8.8 | 100 | 5 | 3300 |
| 12 | 1 | 5.6 | 0.6 | 8 | 125 | 20 | 3600 |
| 13 | 2 | 2 | 1.7 | 8.6 | 75 | 5 | 3800 |
| 14 | 2 | 1.8 | 0.9 | 10.6 | 125 | 15 | 1900 |
| 15 | 2 | 4.4 | 1.3 | 9.2 | 125 | 10 | 2000 |
| 16 | 2 | 3.2 | 2 | 10.2 | 125 | 10 | 1500 |
| 17 | 2 | 4 | 1.8 | 8.2 | 25 | 10 | 2900 |
| 18 | 2 | 5 | 1.9 | 8.4 | 100 | 10 | 2900 |
| 19 | 2 | 3 | 1.7 | 11.2 | 25 | 15 | 2000 |
| 20 | 2 | 0.8 | 1.1 | 9 | 50 | 15 | 3100 |
| 21 | 3 | 1 | 1.1 | 11 | 100 | 15 | 1400 |
| 22 | 3 | 4.8 | 1.9 | 9.8 | 50 | 20 | 2800 |
| 23 | 3 | 3.8 | 1.3 | 9 | 75 | 15 | 3500 |
| 24 | 3 | 5.2 | 1 | 8.8 | 100 | 15 | 3900 |
| 25 | 3 | 2.4 | 1 | 10.8 | 75 | 15 | 2200 |
| 26 | 3 | 5.4 | 0.8 | 11.2 | 100 | 10 | 3200 |
| 27 | 3 | 3.8 | 1.4 | 10.4 | 100 | 10 | 2100 |
| 28 | 3 | 6 | 0.6 | 8.4 | 75 | 15 | 2700 |
| 29 | 4 | 0.6 | 1.4 | 9.4 | 150 | 20 | 3500 |
| 30 | 4 | 5.6 | 1.7 | 9.8 | 50 | 20 | 900 |
| 31 | 4 | 4.2 | 1 | 10.4 | 75 | 5 | 1200 |
| 32 | 4 | 2.6 | 0.8 | 11.4 | 50 | 10 | 1000 |

| **Table S 10 (Continued) Device performance of the initial 32 sets of process parameters** | | | | |
| --- | --- | --- | --- | --- |
| Number | Voc (V) | Jsc (mA cm-2) | FF (%) | PCE (%) |
| 1 | 0.870 | 27.45 | 69.92 | 16.70 |
| 2 | 0.890 | 21.20 | 75.71 | 14.29 |
| 3 | 0.884 | 25.84 | 71.70 | 16.39 |
| 4 | 0.892 | 26.66 | 75.36 | 17.92 |
| 5 | 0.870 | 27.06 | 77.16 | 18.17 |
| 6 | 0.861 | 27.69 | 69.65 | 16.60 |
| 7 | 0.851 | 26.84 | 66.29 | 15.03 |
| 8 | 0.884 | 27.49 | 76.05 | 18.34 |
| 9 | 0.865 | 27.54 | 75.20 | 17.77 |
| 10 | 0.868 | 27.47 | 75.03 | 17.75 |
| 11 | 0.869 | 26.67 | 77.64 | 17.85 |
| 12 | 0.851 | 10.68 | 72.33 | 6.52 |
| 13 | 0.866 | 18.28 | 76.32 | 12.11 |
| 14 | 0.863 | 28.26 | 76.99 | 18.84 |
| 15 | 0.864 | 26.06 | 74.51 | 16.83 |
| 16 | 0.841 | 8.50 | 43.31 | 3.10 |
| 17 | 0.869 | 19.82 | 61.39 | 10.60 |
| 18 | 0.862 | 18.71 | 59.40 | 9.60 |
| 19 | 0.843 | 11.58 | 45.15 | 4.40 |
| 20 | 0.882 | 26.46 | 76.19 | 17.76 |
| 21 | 0.860 | 28.10 | 69.03 | 16.66 |
| 22 | 0.867 | 26.23 | 68.12 | 15.46 |
| 23 | 0.866 | 25.71 | 76.99 | 17.10 |
| 24 | 0.853 | 14.73 | 73.30 | 9.19 |
| 25 | 0.868 | 27.79 | 77.76 | 18.73 |
| 26 | 0.864 | 25.37 | 78.12 | 17.13 |
| 27 | 0.860 | 28.20 | 76.04 | 18.44 |
| 28 | 0.847 | 10.49 | 72.72 | 6.46 |
| 29 | 0.883 | 25.89 | 75.88 | 17.35 |
| 30 | 0.837 | 17.46 | 51.02 | 7.46 |
| 31 | 0.844 | 28.32 | 71.47 | 17.08 |
| 32 | 0.849 | 27.61 | 71.77 | 16.82 |

| **Table S 11 D18:L8BO MOBO 1-3 round iteration process parameters and device performance** | | | | | | | |
| --- | --- | --- | --- | --- | --- | --- | --- |
| Number | Solid  additive | Additive  concentration | D:A  ratio | BHJ concentration | A. Tem. (℃) | A. Ti. (min) | SS (rpm) |
| R1-1 | 1 | 0.4 | 1 | 10.2 | 75 | 10 | 3400 |
| R1-2 | 2 | 2.2 | 0.6 | 9.6 | 125 | 15 | 2500 |
| R1-3 | 2 | 2 | 0.7 | 9.6 | 125 | 15 | 2300 |
| R1-4 | 2 | 1.6 | 0.6 | 10 | 125 | 15 | 2200 |
| R1-5 | 3 | 2 | 1.4 | 10.6 | 75 | 10 | 3400 |
| R2-1 | 1 | 2 | 1.1 | 10 | 50 | 5 | 2600 |
| R2-2 | 2 | 4.2 | 0.9 | 9.8 | 125 | 15 | 1900 |
| R2-3 | 3 | 2 | 1.4 | 10 | 75 | 15 | 3300 |
| R2-4 | 3 | 2.6 | 1.4 | 10.8 | 75 | 10 | 2800 |
| R2-5 | 3 | 2.4 | 1.3 | 10.6 | 75 | 15 | 2900 |
| R3-1 | 1 | 0.8 | 1.6 | 10 | 50 | 5 | 3400 |
| R3-2 | 2 | 4.2 | 0.8 | 8.4 | 150 | 10 | 1800 |
| R3-3 | 3 | 2.6 | 1.2 | 11.6 | 75 | 15 | 3100 |
| R3-4 | 3 | 3.4 | 1.3 | 11.2 | 75 | 15 | 3000 |
| R3-5 | 3 | 2.2 | 1.2 | 10.8 | 75 | 15 | 2900 |

| **Table S 11 (Continued) D18:L8BO MOBO 1-3 round iteration process parameters and device performance** | | | | |
| --- | --- | --- | --- | --- |
| Number | Voc (V) | Jsc (mA cm-2) | FF (%) | PCE (%) |
| R1-1 | 0.887 | 26.87 | 76.09 | 18.02 |
| R1-2 | 0.872 | 24.33 | 76.01 | 16.02 |
| R1-3 | 0.880 | 24.93 | 76.17 | 16.60 |
| R1-4 | 0.869 | 22.52 | 73.99 | 14.38 |
| R1-5 | 0.890 | 27.78 | 79.27 | 19.59 |
| R2-1 | 0.887 | 25.97 | 78.22 | 18.22 |
| R2-2 | 0.862 | 27.02 | 78.75 | 18.56 |
| R2-3 | 0.874 | 24.71 | 77.30 | 16.88 |
| R2-4 | 0.898 | 26.75 | 79.77 | 19.36 |
| R2-5 | 0.890 | 27.90 | 81.06 | 20.17 |
| R3-1 | 0.902 | 26.12 | 76.31 | 18.18 |
| R3-2 | 0.874 | 24.36 | 77.71 | 16.73 |
| R3-3 | 0.876 | 27.25 | 78.37 | 18.91 |
| R3-4 | 0.868 | 27.24 | 78.91 | 18.87 |
| R3-5 | 0.882 | 27.18 | 79.39 | 19.24 |

| **Table S 12 Parameter range and sampling interval** | | |
| --- | --- | --- |
| Parameter | Range | Sampling interval |
| PM7 | 0-10 mg mL−1 | 0.1 mg mL−1 |
| Y6 | 0-10 mg mL−1 | 0.1 mg mL−1 |
| Spin-speed coating | 1000-5000 rpm | 100 rpm |
| Annealing temperature | 0-150 °C | 10 °C |
| Annealing time | 0-15 min | 1 min |

| **Table S 13 PM7:Y6 initial sampling dataset** | | | | | | | | | | |
| --- | --- | --- | --- | --- | --- | --- | --- | --- | --- | --- |
| Number | PM7  (mg mL-1) | Y6  (mg mL-1) | A. Tem. (℃) | SS (rpm) | A. Ti (min) | Voc (V) | Jsc  (mA cm-2) | | FF (%) | PCE (%) |
| 1 | 1.8 | 7.9 | 90 | 1300 | 13 | 0.864 | 24.114 | 61.178 | | 12.746 |
| 2 | 9.9 | 6.2 | 25 | 2300 | 3 | 0.908 | 24.066 | 44.921 | | 9.819 |
| 3 | 4.2 | 4.2 | 30 | 4800 | 11 | 0.867 | 10.262 | 45.725 | | 4.068 |
| 4 | 1.8 | 1.7 | 135 | 2400 | 6 | 0.283 | 4.096 | 27.803 | | 0.322 |
| 5 | 0.2 | 7 | 35 | 1800 | 11 | 0.701 | 7.216 | 29.717 | | 1.504 |
| 6 | 7.3 | 8.6 | 75 | 4600 | 9 | 0.893 | 25.842 | 66.191 | | 15.278 |
| 7 | 6.8 | 4.4 | 120 | 4300 | 4 | 0.881 | 17.115 | 51.877 | | 7.825 |
| 8 | 2.9 | 2.5 | 130 | 1500 | 15 | 0.862 | 17.794 | 55.138 | | 8.461 |
| 9 | 7.7 | 0.8 | 55 | 3800 | 3 | 0.359 | 0.872 | 24.622 | | 0.077 |
| 10 | 5.2 | 5.6 | 70 | 3400 | 9 | 0.888 | 20.793 | 65.095 | | 12.026 |
| 11 | 8.7 | 9.7 | 110 | 2900 | 2 | 0.875 | 27.918 | 62.166 | | 15.133 |
| 12 | 6.2 | 0.1 | 15 | 3100 | 8 | 0.042 | 0.381 | 25.163 | | 0.004 |

| **Table S 14 PM7:Y6 MOBO 1-4 round iteration process parameters and device performance** | | | | | | | | | |
| --- | --- | --- | --- | --- | --- | --- | --- | --- | --- |
| Number | PM7  (mg mL-1) | Y6  (mg mL-1) | A. Tem. (℃) | SS (rpm) | A. Ti (min) | Voc (V) | Jsc  (mA cm-2) | FF (%) | PCE (%) |
| R1-1 | 2.3 | 7 | 100 | 1400 | 13 | 0.863 | 21.603 | 66.920 | 12.526 |
| R1-2 | 4.1 | 6.4 | 115 | 2000 | 13 | 0.866 | 22.781 | 70.514 | 13.981 |
| R1-3 | 3.8 | 6 | 115 | 1800 | 15 | 0.863 | 23.094 | 66.937 | 13.394 |
| R1-4 | 5.5 | 5.5 | 65 | 3900 | 10 | 0.885 | 18.027 | 66.636 | 10.612 |
| R2-1 | 4.5 | 7.3 | 125 | 1800 | 14 | 0.856 | 27.140 | 67.792 | 15.804 |
| R2-2 | 6.9 | 8.1 | 85 | 2600 | 5 | 0.887 | 26.815 | 66.157 | 15.794 |
| R2-3 | 3.8 | 6.6 | 100 | 2100 | 12 | 0.859 | 20.955 | 61.795 | 11.172 |
| R2-4 | 3.9 | 6.8 | 95 | 2200 | 12 | 0.860 | 19.553 | 63.332 | 10.697 |
| R3-1 | 6.3 | 8.3 | 90 | 2400 | 6 | 0.876 | 25.089 | 68.615 | 15.085 |
| R3-2 | 8.6 | 7.1 | 100 | 3800 | 6 | 0.885 | 25.892 | 66.655 | 15.233 |
| R3-3 | 3.6 | 6.7 | 110 | 1800 | 13 | 0.864 | 21.550 | 69.581 | 12.914 |
| R3-4 | 3.5 | 6.5 | 110 | 1800 | 13 | 0.860 | 21.344 | 69.358 | 12.703 |
| R4-1 | 8.4 | 7.4 | 95 | 3600 | 6 | 0.887 | 27.404 | 60.880 | 14.798 |
| R4-2 | 2.7 | 9.7 | 135 | 1300 | 10 | 0.844 | 25.532 | 61.240 | 13.195 |
| R4-3 | 6.9 | 8.7 | 95 | 2600 | 5 | 0.879 | 27.396 | 67.078 | 16.148 |
| R4-4 | 6.6 | 8.4 | 90 | 2600 | 5 | 0.877 | 27.544 | 65.361 | 15.786 |

| **Table S 15 Parameter range and sampling interval for D18:L8BO:PYIT** | | | |
| --- | --- | --- | --- |
| Parameter | | Range | Sampling interval |
| D18/L8BO:PYIT (D:A ratio) | | 0.6-1.6 | 0.1 |
| L8BO/L8BO:PYIT (A ratio) | | 0-1 | 0.1 |
| Solution concentration (SC) | | 0.5-1.5 mg mL−1 | 0.1 mg mL−1 |
| Solution volume (SV) | | 100-140  uL | 5 uL−1 |
| Gas pressure (GP) | | 15-25 | 1 |
| Solvent vapor annealing (SVA) | 15-60 °C | | 5 °C |
| Annealing temperature (A. Tem.) | 25-155 °C | | 10 °C |
| Annealing time (A. Ti.) | | 1-20 min | 1 min |

| **Table S16 32sets of process parameters for D18:L8BO:PYIT** | | | | | | | | | |
| --- | --- | --- | --- | --- | --- | --- | --- | --- | --- |
| Number | D:A ratio | A ratio | SC | SV | GP | SVA | A. Tem. | | A. Ti. |
| 1 | 0.7 | 0.4 | 1.3 | 135 | 24 | 40 | 110 | 9 | |
| 2 | 0.7 | 0.2 | 1.3 | 105 | 16 | 35 | 50 | 20 | |
| 3 | 1.1 | 0 | 0.9 | 125 | 20 | 15 | 70 | 4 | |
| 4 | 1.4 | 0.6 | 1.4 | 135 | 19 | 35 | 80 | 9 | |
| 5 | 1 | 0.7 | 1.5 | 110 | 22 | 55 | 80 | 3 | |
| 6 | 1.3 | 0.7 | 0.8 | 115 | 22 | 55 | 30 | 7 | |
| 7 | 0.8 | 0.2 | 1.2 | 125 | 21 | 40 | 50 | 16 | |
| 8 | 1.5 | 0.5 | 1.2 | 125 | 25 | 55 | 90 | 14 | |
| 9 | 0.9 | 0.3 | 0.7 | 140 | 23 | 40 | 130 | 12 | |
| 10 | 1.4 | 0.3 | 1.1 | 115 | 20 | 30 | 80 | 19 | |
| 11 | 1.2 | 0.1 | 1.1 | 110 | 22 | 25 | 110 | 10 | |
| 12 | 0.6 | 0.9 | 1 | 130 | 17 | 20 | 110 | 19 | |
| 13 | 1.3 | 0.8 | 1.3 | 130 | 15 | 30 | 150 | 15 | |
| 14 | 1 | 0.4 | 0.6 | 135 | 19 | 30 | 70 | 5 | |
| 15 | 1.1 | 0.6 | 1 | 110 | 20 | 25 | 140 | 5 | |
| 16 | 1.4 | 0.4 | 1.2 | 100 | 17 | 30 | 40 | 7 | |
| 17 | 1.1 | 0.6 | 0.7 | 135 | 15 | 60 | 50 | 2 | |
| 18 | 1.5 | 1 | 1.5 | 115 | 18 | 50 | 60 | 17 | |
| 19 | 0.8 | 0.3 | 0.6 | 115 | 24 | 45 | 120 | 10 | |
| 20 | 1.1 | 0.2 | 0.6 | 130 | 18 | 45 | 150 | 4 | |
| 21 | 1.3 | 0.6 | 1.4 | 120 | 20 | 25 | 130 | 18 | |
| 22 | 0.9 | 0.4 | 1.1 | 105 | 19 | 50 | 30 | 11 | |
| 23 | 0.8 | 0.1 | 0.5 | 125 | 23 | 20 | 30 | 13 | |
| 24 | 1.5 | 0.8 | 0.8 | 105 | 21 | 40 | 150 | 8 | |
| 25 | 1.5 | 0.1 | 1 | 120 | 16 | 45 | 100 | 14 | |
| 26 | 0.6 | 1 | 0.8 | 105 | 23 | 20 | 130 | 16 | |
| 27 | 0.8 | 0.9 | 1.4 | 120 | 23 | 45 | 40 | 6 | |
| 28 | 1.2 | 0.7 | 0.9 | 130 | 25 | 35 | 90 | 17 | |
| 29 | 1.6 | 0.5 | 0.9 | 100 | 16 | 50 | 120 | 1 | |
| 30 | 1.2 | 0.1 | 0.5 | 110 | 21 | 60 | 100 | 12 | |
| 31 | 0.9 | 0.9 | 0.9 | 140 | 17 | 15 | 140 | 3 | |
| 32 | 0.9 | 0.8 | 0.7 | 120 | 18 | 25 | 60 | 12 | |

| **Table S 16 (Continued) Device performance of the initial 32 sets of process parameters for D18:L8BO:PYIT** | | | | |
| --- | --- | --- | --- | --- |
| Number | Voc (V) | Jsc (mA cm-2) | FF (%) | PCE (%) |
| 1 | 0.92 | 22.56 | 38.05 | 7.86 |
| 2 | 0.94 | 21.23 | 41.4 | 8.22 |
| 3 | 0.95 | 19.82 | 47.28 | 8.94 |
| 4 | 0.93 | 20.55 | 55.29 | 10.54 |
| 5 | 0.91 | 21.7 | 54.85 | 10.78 |
| 6 | 0.91 | 20.66 | 57.57 | 10.87 |
| 7 | 0.94 | 22.61 | 52.39 | 11.18 |
| 8 | 0.93 | 20.73 | 58.26 | 11.19 |
| 9 | 0.92 | 23.38 | 54.32 | 11.66 |
| 10 | 0.94 | 22.91 | 54.66 | 11.76 |
| 11 | 0.92 | 23.05 | 56.02 | 11.92 |
| 12 | 0.89 | 24.3 | 56.06 | 12.17 |
| 13 | 0.88 | 25.25 | 54.83 | 12.24 |
| 14 | 0.94 | 22.42 | 58.41 | 12.3 |
| 15 | 0.93 | 21.21 | 64.23 | 12.67 |
| 16 | 0.95 | 22.25 | 61.86 | 13.07 |
| 17 | 0.92 | 22.47 | 63.7 | 13.24 |
| 18 | 0.89 | 22.08 | 68.56 | 13.53 |
| 19 | 0.94 | 23.01 | 63.37 | 13.72 |
| 20 | 0.92 | 21.82 | 68.95 | 13.87 |
| 21 | 0.9 | 25.27 | 60.8 | 13.9 |
| 22 | 0.93 | 23.04 | 65.44 | 13.97 |
| 23 | 0.94 | 23.04 | 65.39 | 14.12 |
| 24 | 0.89 | 22.1 | 73.71 | 14.57 |
| 25 | 0.94 | 24.58 | 64.07 | 14.77 |
| 26 | 0.89 | 24.27 | 70 | 15.26 |
| 27 | 0.91 | 24.33 | 68.94 | 15.4 |
| 28 | 0.92 | 23.98 | 70.56 | 15.8 |
| 29 | 0.93 | 23.37 | 73.54 | 15.92 |
| 30 | 0.93 | 25.78 | 66.18 | 16.12 |
| 31 | 0.9 | 26.3 | 74.75 | 17.54 |
| 32 | 0.9 | 26.76 | 75.09 | 17.93 |

| **Table S17 D18:L8BO:PYIT MOBO 1-3 round iteration process parameters and device performance** | | | | | | | | |
| --- | --- | --- | --- | --- | --- | --- | --- | --- |
| Number | D:A ratio | A ratio | SC | SV | GP | SVA | A. Tem. | A. Ti |
| R1-1 | 0.8 | 0.8 | 1.1 | 120 | 18 | 25 | 45 | 14 |
| R1-2 | 1.5 | 0.8 | 1.2 | 100 | 18 | 25 | 95 | 14 |
| R1-3 | 1.2 | 0.8 | 1 | 140 | 20 | 25 | 115 | 20 |
| R1-4 | 0.6 | 0.8 | 1.4 | 140 | 20 | 25 | 145 | 19 |
| R1-5 | 1.6 | 0.8 | 1.2 | 125 | 20 | 25 | 85 | 19 |
| R2-1 | 0.8 | 0.8 | 1 | 115 | 19 | 25 | 115 | 20 |
| R2-2 | 0.9 | 0.8 | 1.5 | 125 | 23 | 25 | 85 | 20 |
| R2-3 | 1.6 | 0.9 | 0.5 | 130 | 23 | 15 | 95 | 19 |
| R2-4 | 1.6 | 0.9 | 1.4 | 130 | 18 | 15 | 125 | 16 |
| R2-5 | 1.6 | 0.9 | 0.6 | 135 | 23 | 15 | 145 | 15 |
| R3-1 | 0.8 | 0.8 | 0.9 | 125 | 16 | 25 | 125 | 17 |
| R3-2 | 0.7 | 0.8 | 0.9 | 115 | 23 | 25 | 145 | 10 |
| R3-3 | 0.7 | 1 | 0.5 | 135 | 24 | 15 | 155 | 18 |
| R3-4 | 0.7 | 1 | 0.5 | 120 | 17 | 15 | 155 | 6 |
| R3-5 | 1.6 | 1 | 0.5 | 120 | 19 | 15 | 155 | 1 |

| **Table S 17 (Continued) D18:L8BO:PYIT MOBO 1-3 round iteration process parameters and device performance** | | | | |
| --- | --- | --- | --- | --- |
| Number | Voc (V) | Jsc (mA cm-2) | FF (%) | PCE (%) |
| R1-1 | 0.907 | 26.66 | 75.17 | 17.97 |
| R1-2 | 0.906 | 26.52 | 69.03 | 16.59 |
| R1-3 | 0.908 | 26.47 | 73.4 | 17.63 |
| R1-4 | 0.909 | 26.65 | 73.73 | 17.87 |
| R1-5 | 0.913 | 24.96 | 71.3 | 16.25 |
| R2-1 | 0.908 | 26.7 | 75.63 | 18.12 |
| R2-2 | 0.903 | 26.24 | 75.43 | 17.88 |
| R2-3 | 0.899 | 25.91 | 74.64 | 17.39 |
| R2-4 | 0.905 | 25.26 | 71.71 | 16.39 |
| R2-5 | 0.9 | 26.47 | 75.07 | 17.89 |
| R3-1 | 0.905 | 26.74 | 72.67 | 17.59 |
| R3-2 | 0.902 | 26.04 | 73.77 | 17.32 |
| R3-3 | 0.895 | 26.56 | 72.19 | 17.15 |
| R3-4 | 0.893 | 26.54 | 72.95 | 17.29 |
| R3-5 | 0.891 | 26.1 | 72.94 | 16.97 |

**Reference**

1. Du, X., Lüer, L., Heumueller, T., Wagner, J., Berger, C., Osterrieder, T., Wortmann, J., Langner, S., Vongsaysy, U., Bertrand, M., et al. (2021). Elucidating the Full Potential of OPV Materials Utilizing a High-Throughput Robot-Based Platform and Machine Learning. Joule *5*, 495–506. https://doi.org/10.1016/j.joule.2020.12.013.
